# Supplementary material for: Siphon-Like Effect in Chemical Reactions: Kinetic Basis of Bifunctional OX-ZEO Catalyst for Selective Syngas Conversion to Light Olefins
Source: Research Square preprint supplement (doi:10.21203/rs.3.rs-4356602/v1), 2024-12-23
Supplement: Supplementary file 1 [file bcea88a49f82771c2234f88c.docx]

**Supporting Information**

**Siphon-Like Effect in Chemical Reactions: Kinetic Basis of Bifunctional OX-ZEO Catalyst for Selective Syngas Conversion to Light Olefins**

**Zhuangzhuang Lai****†1, Danfeng Xiong****†1, Peijun Hu****†‡, Jianfu Chen†*, and Haifeng Wang†***

† State Key Laboratory of Green Chemical Engineering and Industrial Catalysis, Centre for Computational Chemistry and Research Institute of Industrial Catalysis, East China University of Science and Technology, Shanghai 200237, China

‡ School of Chemistry and Chemical Engineering, The Queen’s University of Belfast, Belfast, BT9 5AG, UK

1 Contributed equally to this work

*Corresponding Author(s): jfchen@ecust.edu.cn (J. F. Chen); hfwang@ecust.edu.cn (H. F. Wang)

**Supplementary Information S1. Description of the diffusion process in the proximity of ZnCrOx and MOR**

In our reactor model, it is important to emphasize that the diffusion mainly occurs in the interstitial spaces between the oxide and zeolite particles. This diffusion process involves the transport of the main products, CH2CO and CH4, from the ZnCrOx surface to the MOR inlet. Given the relatively small molecular diameters of the CH2CO (3.04 Å) and CH4 (2.19 Å) molecules compared to the larger interstitial spaces (>30 nm), the diffusion of these species falls within the domain of molecular diffusion, as supported by the literature,1 and illustrated in the following Figure. This supports the applicability of Fick's law in describing this diffusion process.


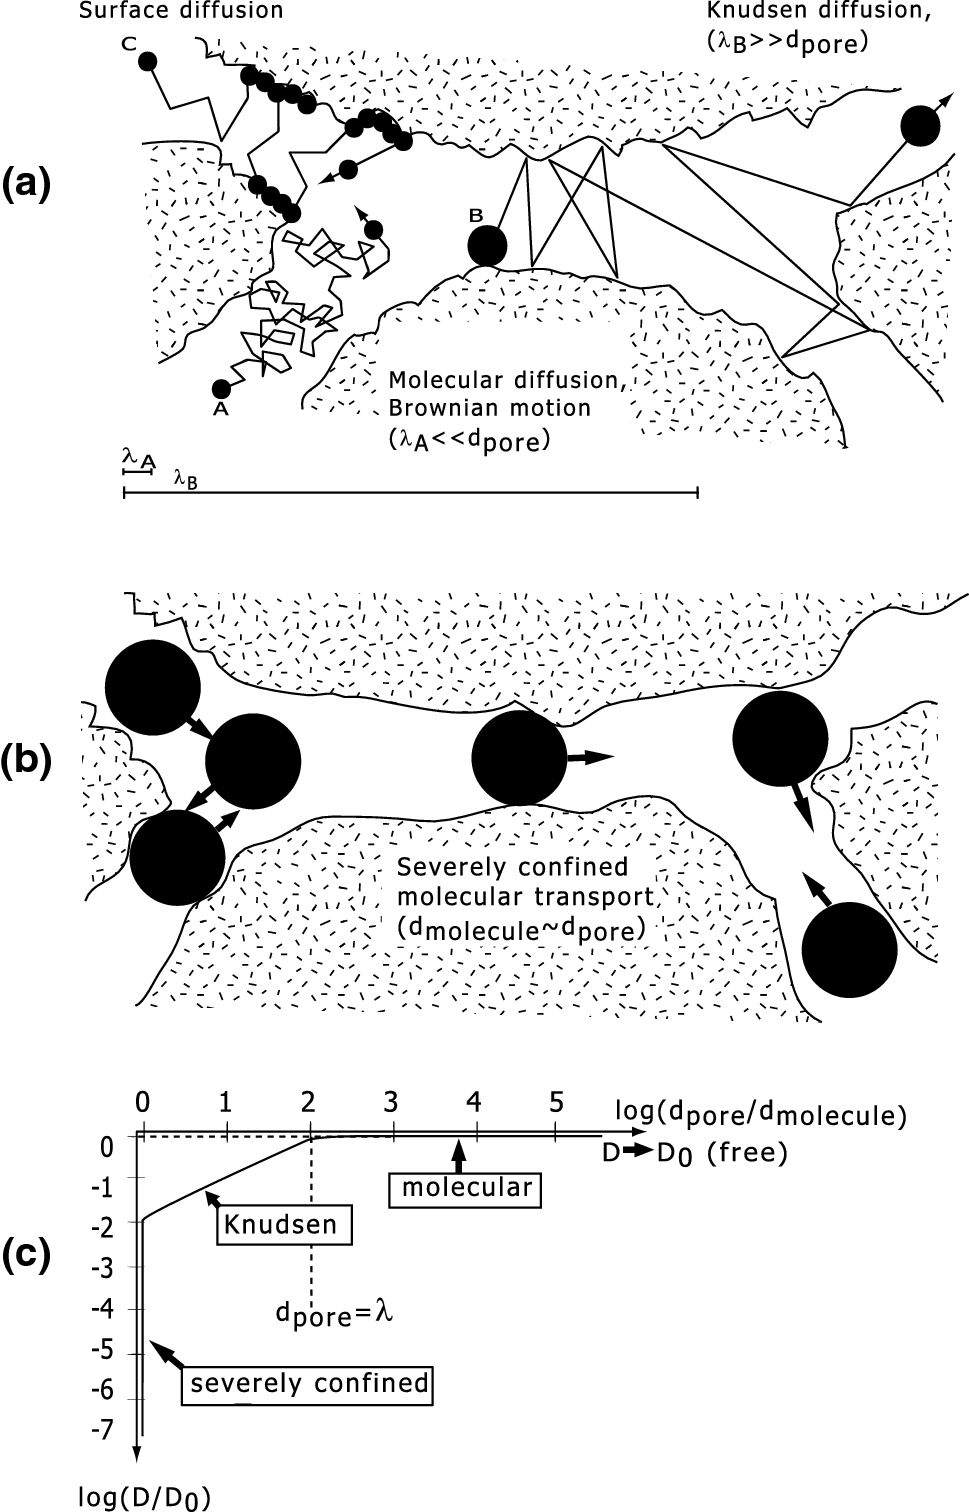


**Figure.** Schematic representation of the different diffusion mechanisms in a porous medium: (a) molecular diffusion, Knudsen diffusion, and surface diffusion, all relevant in mesoporous materials; (b) configurational diffusion, which is typical in zeolites, but could also occur for larger probe molecules in mesoporous materials; (c) diffusivities in different diffusion regimes. Adapted with permission from Ref. 1, Copyright (2021) SPRINGER LINK.


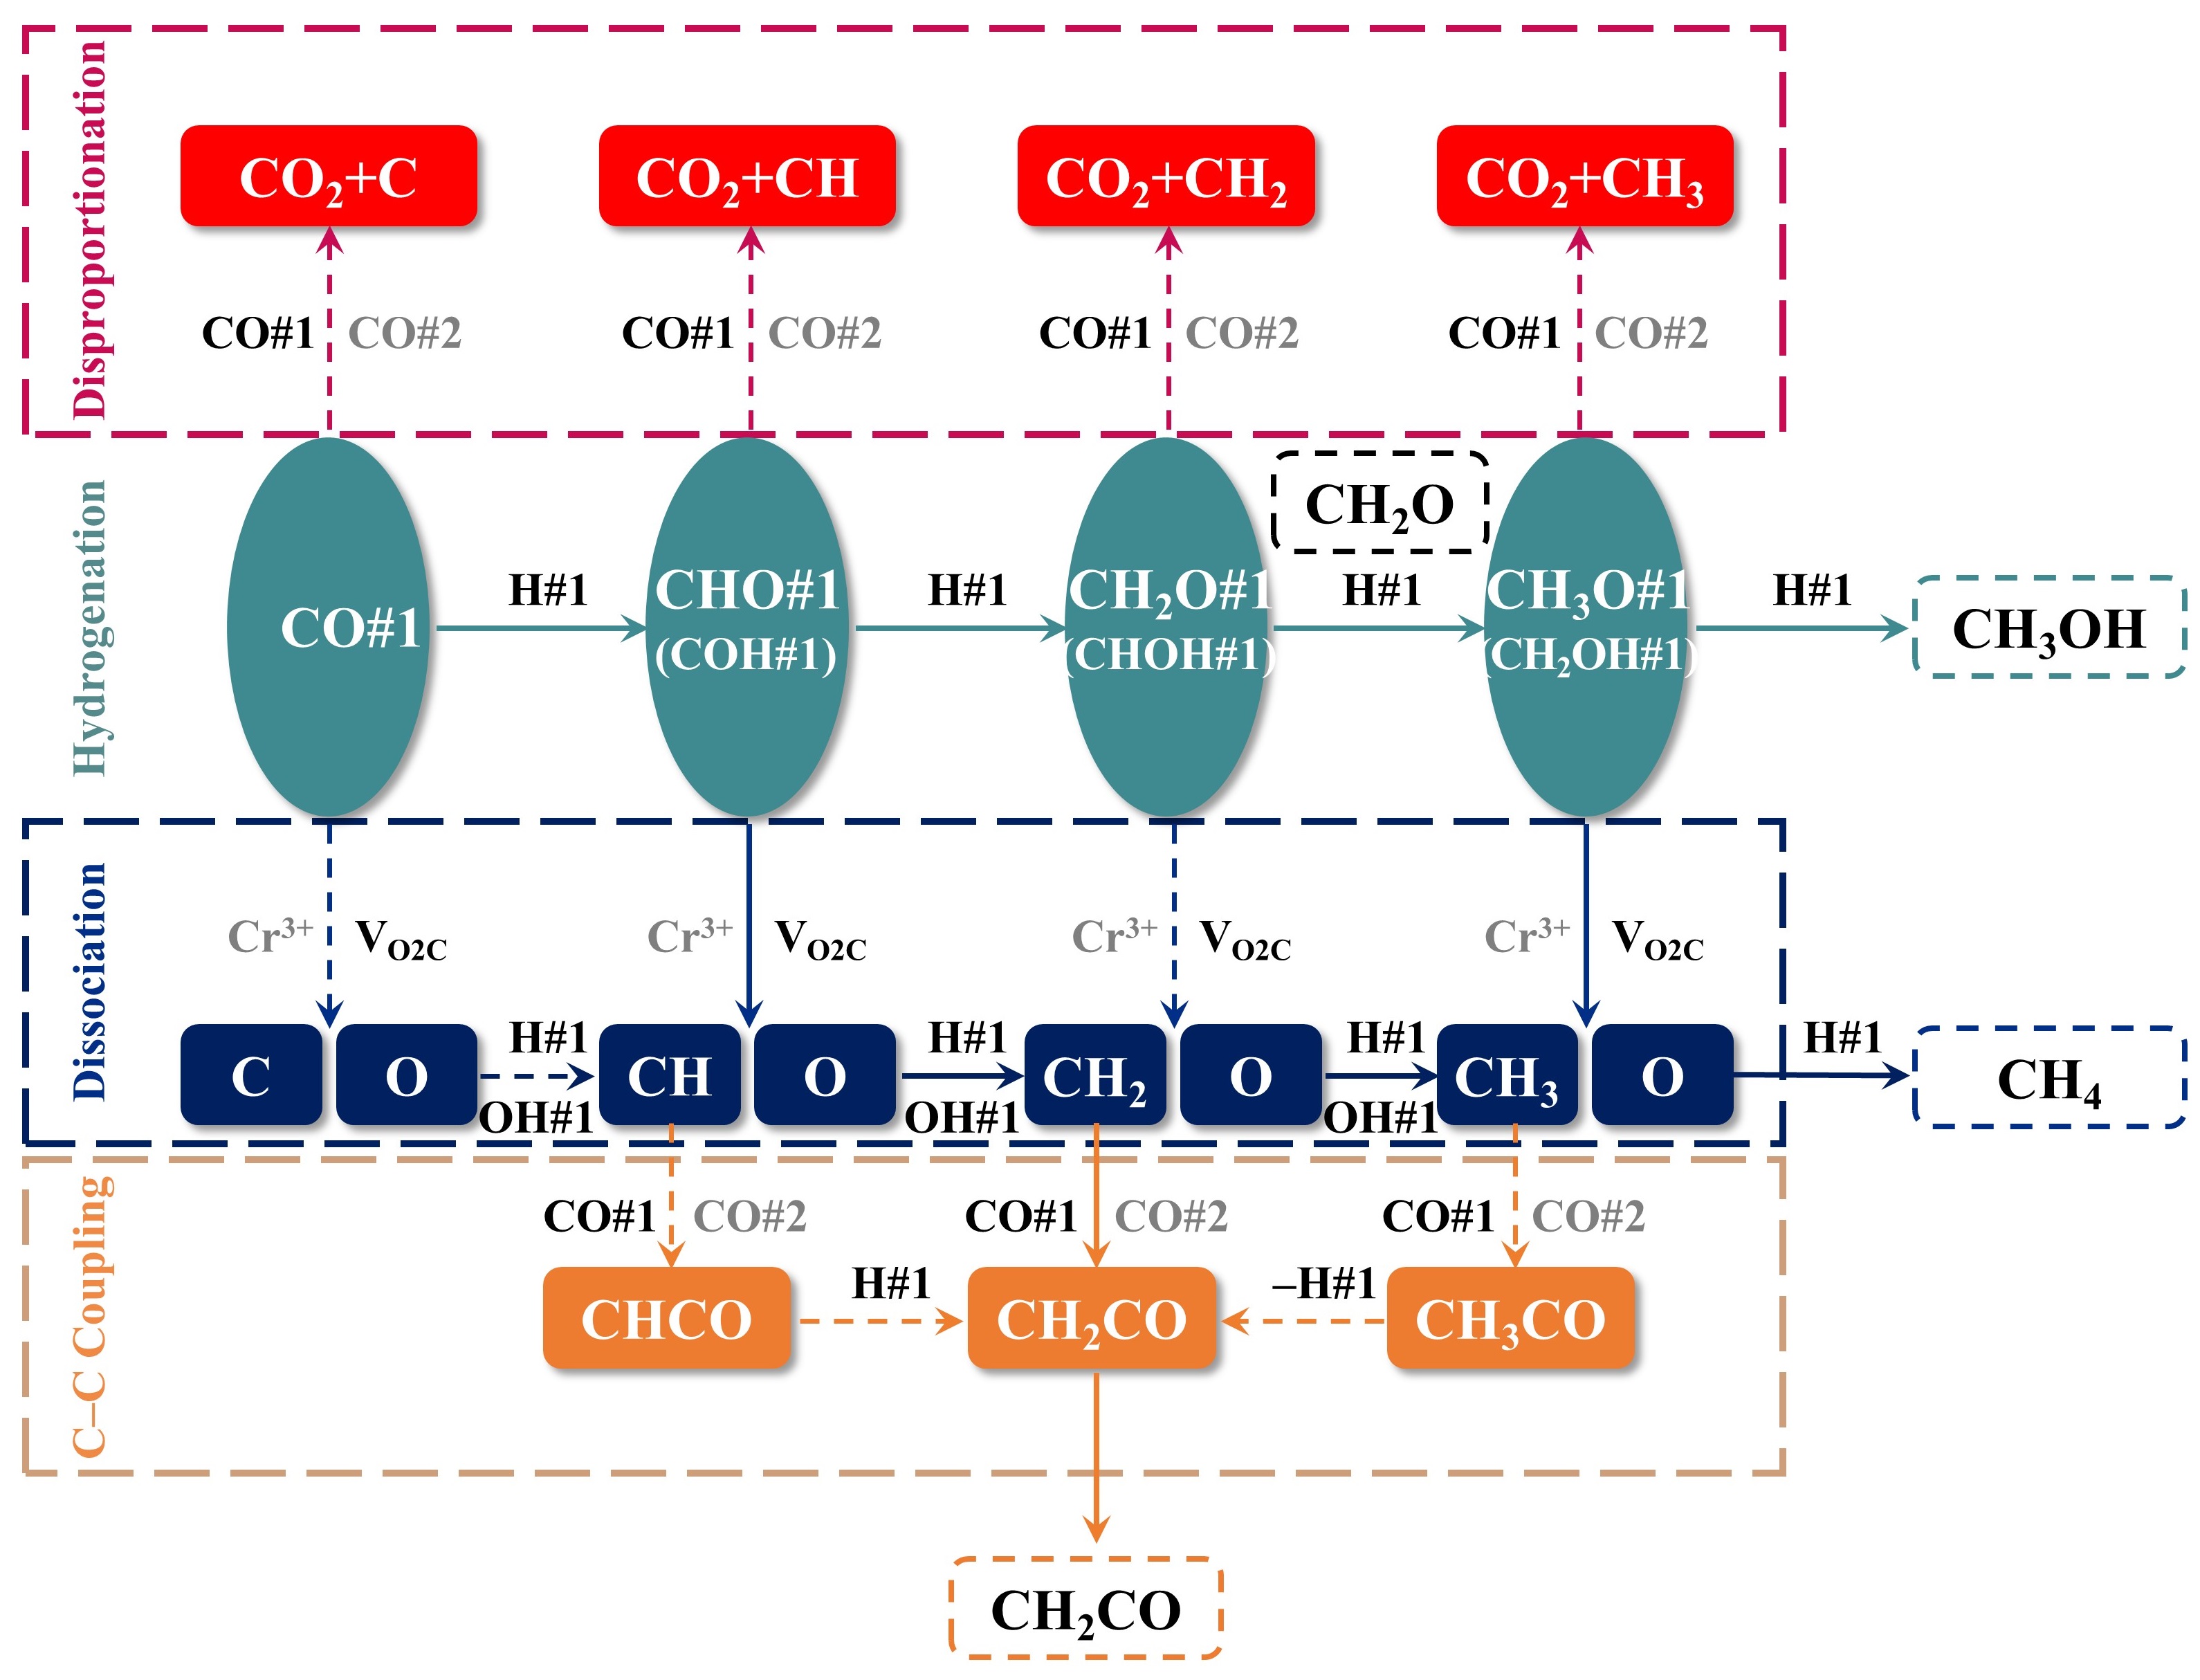


**Figure S1**. Diagram of syngas conversion reaction network on the reduced ZnCr2O4(110) surface, where #1 and #2 represent the vacancy site of two-coordinated oxygen (VO2C) and four-coordinated Cr3+ site over ZnCrOx.2

**Supplementary Information S2. Reaction mechanism for ketene conversion within the MOR**


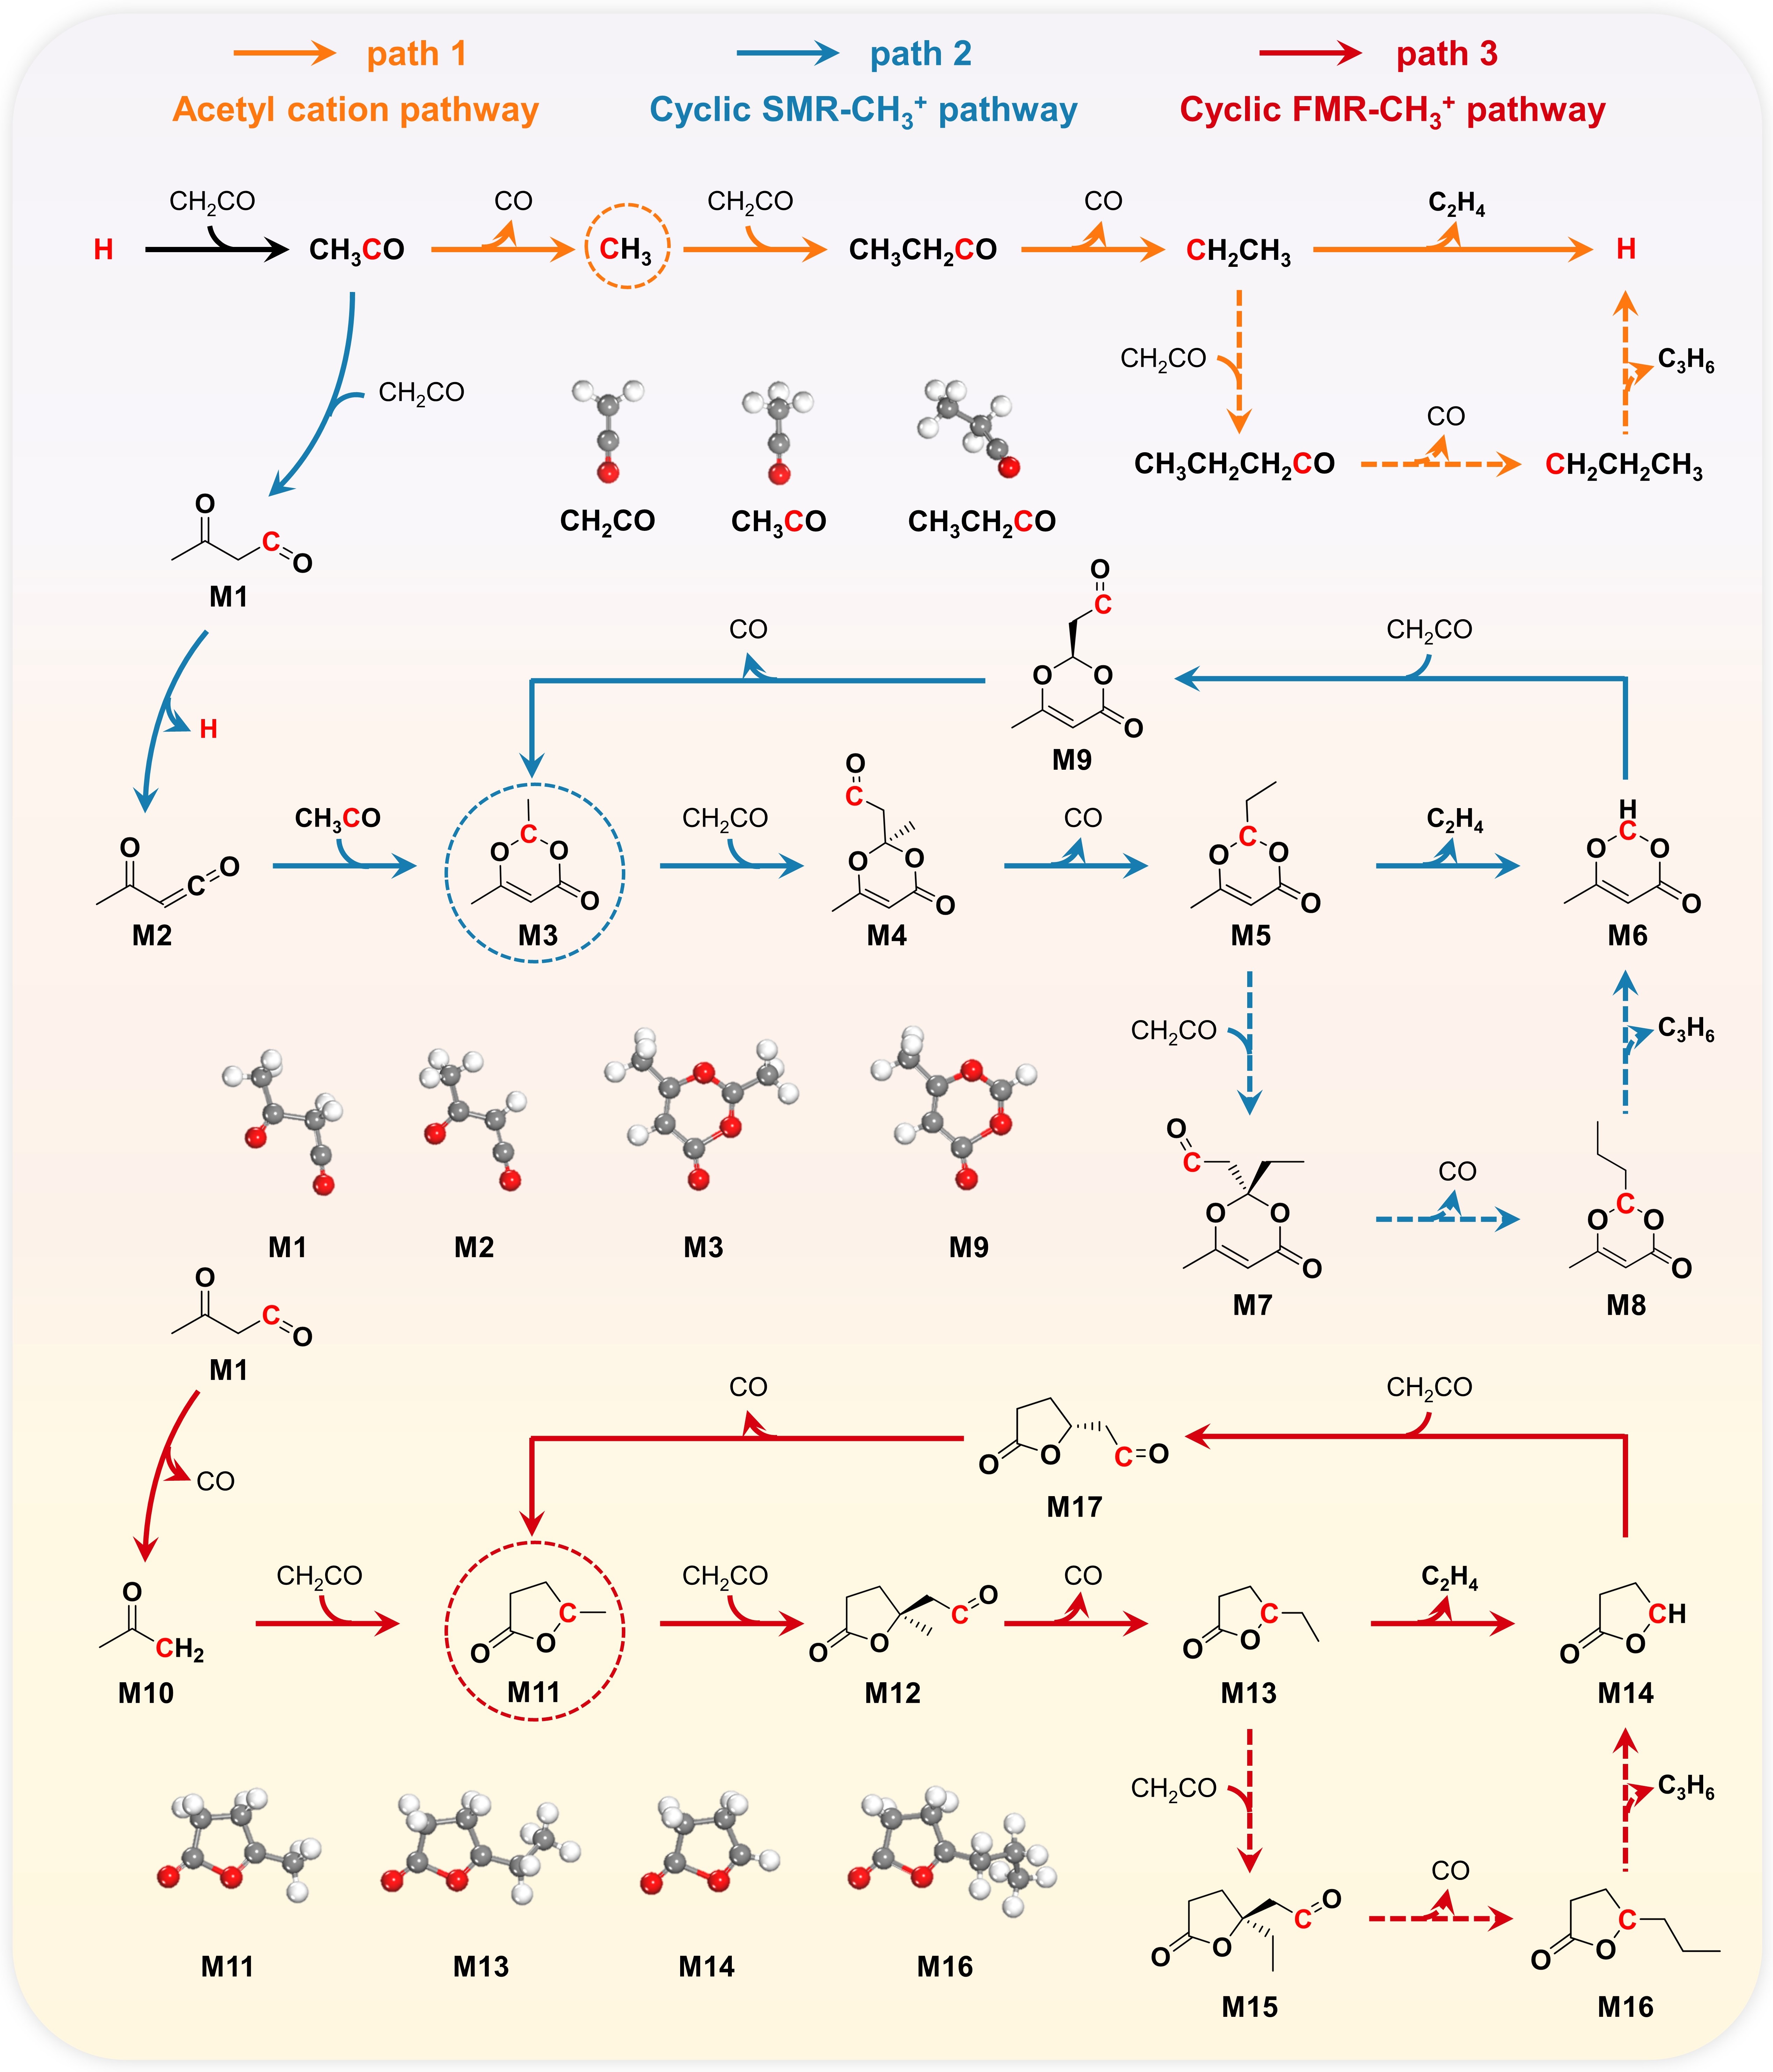


**Figure S2**. Paths 1, 2 and 3 for ketene conversion to ethylene (solid line) and propylene (dashed line) within MOR as well as the structures of some typical intermediates. The H and C marked in red denote the B-acid site and carbocation, respectively.

In fact, have thoroughly investigated the potential pathways of ketene conversion within the MOR’s 8-membered-ring side pockets (8MR) and 12-membered-ring (12MR) channels.3 As shown in Figure S2, the energetics of the three paths involved in both reported and unreported studies in the literature 3-6 have been calculated by DFT and the slow-growth method within the framework of ab initio molecular dynamics (AIMD) simulations. The quantitative kinetic analysis confirms the experimental results that the 8MR is the real active site and follows the path 1 to form the light olefins.3, 7 Given the complexity and importance of the ketene conversion mechanism within MOR, we have prepared a separate manuscript focusing on this topic and included it in the submission.3 Thus, in the main manuscript, we have selectively included the optimal reaction channel of ketene conversion within the MOR, coupling it with the reaction network on the ZnCrOx surface to maintain a clear focus on the central research objectives. It should be noted that in this process, the diffusion of CH2CO into the MOR is described as occurring from the 12MR inlet to its interior, corresponding to step R68 in Table S1. This is grounded on the experimental results that revealed the 12MR as the diffusion channel.7 Once inside, the ketene diffuses into the 8MR and adsorbs onto the Brønsted-acid site with a Gibbs free energy of -0.06 eV, encountering a Gibbs free energy barrier of 0.14 eV, as detailed in step R69 in Table S1.

Additionally, in our research,3 we have indeed found some key intermediates similar to the hydrocarbon pool species mentioned in Refs. 5 and 6, such as CH3, M3 and M11 formed in path 1, path 2 and path 3, respectively. The quantitative kinetic analysis revealed that ketene conversion within MOR follows a typical autocatalytic process, divided into the generation of reactive intermediates (CH3, M3 and M11) and their subsequent catalysis, conforming the essence of the hydrocarbon pool mechanism within the zeolite.

We further investigated the impact of the Brønsted-acid within the 12MR on ketene adsorption and conversion. Our calculations indicate that the Brønsted-acid within the 12MR preferentially facilitates ketene adsorption with a Gibbs free energy of -0.14 eV; however, the subsequent diffusion into the 8MR requires overcoming a Gibbs free energy barrier of 0.25 eV, as shown in Figure S2-1. Further microkinetic analysis reveals that the activity remains largely unaffected, reflecting the minimal influence of the Brønsted-acid within the 12MR on the ketene conversion activity. This observation is consistent with the fact that the catalytic capability of ZnCrOx is the rate-limiting step in the conversion of syngas to light olefins over the ZnCrOx coupled MOR catalytic system (Table S1-2), indicating that the activity is independent of the catalytic capability within the MOR.


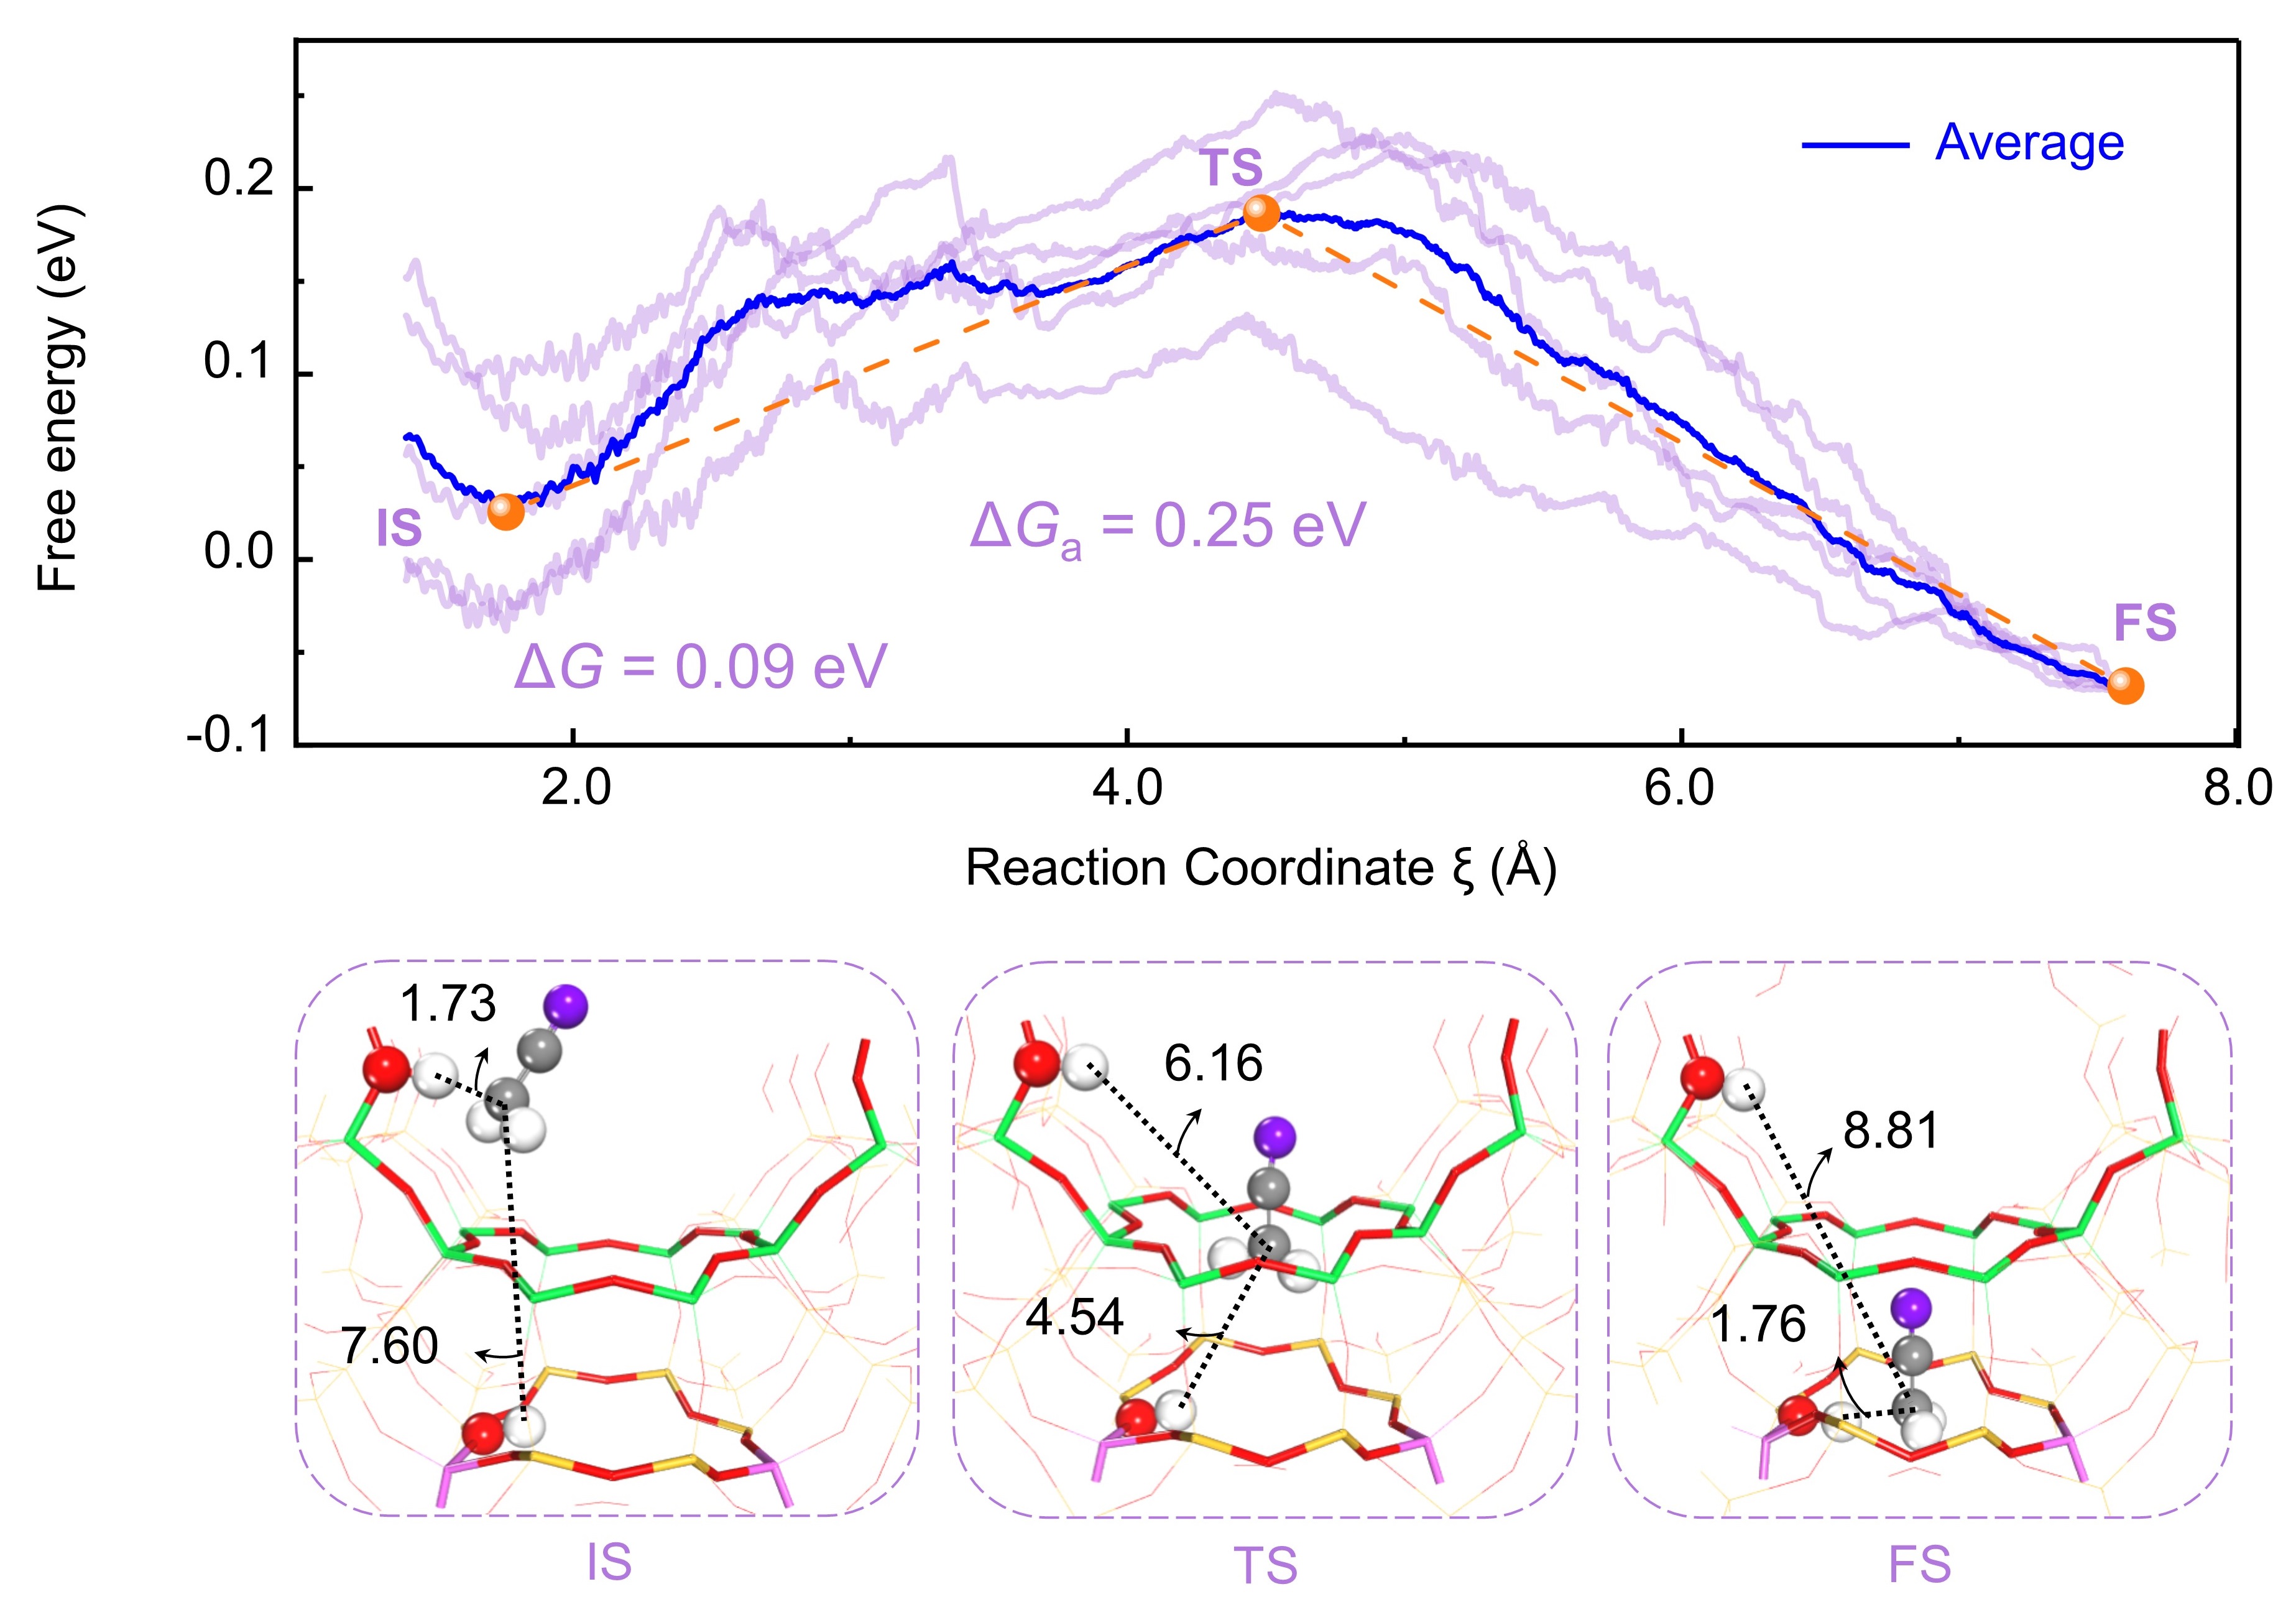


**Figure S2-1.** Free energy profiles of the CH2CO diffusion adsorbed on the Brønsted-acid from the 12MR to the 8MR using the slow-growth method. The blue line represents the average free energy profile.

**Table S1.** Kinetic data, *E*a (Gibbs free energy barrier), ∆*G* (Gibbs free energy change), *Zi* (reversibility of step *i*),and *ri* (reaction rate of step *i*), for elementary reactions in all possible pathway of syngas conversion over ZnCrOx coupled MOR catalyst and ZnCrOx catalyst, respectively, obtained from microkinetic using DFT data. #1, #2 and H#3 represent VO2C, Cr3+ site over ZnCrOx and B-acid site over MOR, respectively. Note that species_in represents that species is in the pore of MOR. *p*1_CH2CO and *p*1_CH4 represent the partial pressures of CH2CO and CH4 on ZnCrOx surface, respectively. *p*2_CH2CO and *p*2_CH4 represent the partial pressures of CH2CO and CH4 at the MOR inlet, respectively. *p_*CH2CH2 and *p_*CH4 represent the partial pressures of CH2CH2 and CH4 at the MOR outlet, respectively.

|  |  |  |  | ZnCrOx/MOR | | ZnCrOx | |
| --- | --- | --- | --- | --- | --- | --- | --- |
|  | Rtep *i* | *E*a | ∆*G* | *Zi* | *ri /*s-1 | *Zi* | *ri* /s-1 |
| R1 | CO + #1 ⇆ CO#1 | 0.67 | 0.67 | 1.00 | 2.48×10-3 | 1.00 | 2.19×10-3 |
| R2 | CO + #2 ⇆ CO#2 | 0.85 | 0.85 | 1.00 | 4.69×10-3 | 1.00 | 2.24×10-3 |
| R3 | H2 + #1 ⇆ H2#1 | 0.91 | 0.91 | 1.00 | 2.74×10-3 | 1.00 | 4.32×10-3 |
| R4 | H2#1 + #2 ⇆ H#1 + H#2 | 0.43 | -0.71 | 9.99×10-1 | 2.74×10-3 | 9.98×10-1 | 4.32×10-3 |
| R5 | H#2 + #1 ⇆ H#1 + #2 | 0.00 | -0.64 | 1.00 | 2.73×10-3 | 1.00 | 4.32×10-3 |
| R6 | CO#1 + H#1 ⇆ CHO#1 + #1 | 0.62 | 0.59 | 9.75×10-1 | 2.48×10-3 | 9.82×10-1 | 2.19×10-3 |
| R7 | CO#1 + H#1 ⇆ COH#1 + #1 | 2.22 | 1.94 | 3.59×10-1 | 2.53×10-14 | 3.60×10-1 | 3.15×10-14 |
| R8 | CHO#1 + H#1 ⇆ CH2O#1 + #1 | 0.29 | -0.32 | 9.99×10-1 | 3.08×10-4 | 9.99×10-1 | 3.51×10-4 |
| R9 | CHO#1 + H#1 ⇆ CHOH#1 + #1 | 1.42 | 0.42 | 4.33×10-5 | 3.62×10-10 | 1.45×10-3 | 4.54×10-10 |
| R10 | CH2O#1 + H#1 ⇆ CH3O#1 + #1 | 0.85 | -0.01 | 1.00 | 2.57×10-4 | 1.00 | 2.89×10-4 |
| R11 | CH2O#1 + H#1 ⇆ CH2OH#1 + #1 | 2.71 | 1.58 | 2.06×10-10 | 2.42×10-15 | 6.32×10-8 | 3.03×10-15 |
| R12 | COH#1 + H#1 ⇆ CHOH#1 + #1 | 0.55 | -0.94 | 9.84×10-5 | 2.53×10-14 | 3.31×10-3 | 3.15×10-14 |
| R13 | CHOH#1 + H#1 ⇆ CH2OH#1 + #1 | 1.66 | 0.84 | 4.76×10-6 | 2.65×10-17 | 4.36×10-5 | 1.11×10-15 |
| R14 | CH2OH#1 + H#1 ⇆ CH3OH#1 + #1 | 1.04 | 0.31 | 3.98×106 | -2.19×10-15 | 1.58×104 | -3.34×10-15 |
| R15 | CH3O#1 + H#1 ⇆ CH3OH#1 + #1 | 1.91 | 1.91 | 9.81×10-4 | 1.02×10-6 | 1.19×10-3 | 1.28×10-6 |
| R16 | CH2O#1 ⇆ CH2O + #1 | 0.90 | 0.29 | 1.00 | 3.50×10-6 | 1.00 | 3.52×10-6 |
| R17 | CH3OH#1 ⇆ CH3OH + #1 | 0.00 | -1.34 | 7.77×10-1 | 1.02×10-6 | 7.96×10-1 | 1.28×10-6 |
| R18 | CHO#1 + #1 ⇆ CH#1 + O#1 | 0.22 | -0.93 | 3.39×10-1 | 2.17×10-3 | 5.55×10-1 | 1.84×10-3 |
| R19 | CH2O#1 + #1 ⇆ CH2#1 + O#1 | 1.08 | -1.07 | 3.27×10-5 | 4.73×10-5 | 1.44×10-3 | 5.93×10-5 |
| R20 | CH2O#1 + #2 ⇆ CH2#2 + O#1 | 2.68 | 0.29 | 5.46×10-7 | 8.49×10-14 | 2.43×10-5 | 9.54×10-14 |
| R21 | CHOH#1 + #1 ⇆ CH#1 + OH#1 | 0.36 | -1.12 | 7.48×10-1 | 3.62×10-10 | 9.92×10-1 | 4.54×10-10 |
| R22 | CH2OH#1 + #1 ⇆ CH2#1 + OH#1 | 1.22 | -2.42 | 1.51×101 | -1.41×10-24 | 5.92×101 | -2.24×10-21 |
| R23 | CH2OH#1 + #2 ⇆ CH2#2 + O#1 | 0.30 | -1.06 | 2.52×10-1 | 4.63×10-15 | 9.96×10-1 | 7.48×10-15 |
| R24 | CH3O#1 + #1 ⇆ CH3#1 + O#1 | 1.83 | -0.54 | 3.73×10-9 | 1.92×10-8 | 4.48×10-6 | 2.41×10-8 |
| R25 | CH3O#1 + #2 ⇆ CH3#2 + O#1 | 1.77 | -0.53 | 2.84×10-9 | 2.56×10-4 | 2.16×10-10 | 2.87×10-4 |
| R26 | CH3OH#1 + #1 ⇆ CH3#1 + OH#1 | 0.53 | -2.22 | 3.63×10-10 | 7.79×10-14 | 9.72×10-6 | 1.19×10-13 |
| R27 | CH3OH#1 + #2 ⇆ CH3#2 + OH#1 | 0.74 | -2.21 | 2.76×10-10 | 8.37×10-12 | 4.69×10-10 | 1.14×10-11 |
| R28 | CH#1 + H#1 ⇆ CH2#1 + #1 | 0.94 | -0.46 | 9.63×10-5 | 2.42×10-3 | 2.60×10-3 | 5.62×10-3 |
| R29 | CH#1 + OH#1 ⇆ CH2#1 + O#1 | 0.53 | -0.69 | 1.01 | -2.48×10-4 | 1.00 | -3.78×10-3 |
| R30 | CH2#1 + H#1 ⇆ CH3#1 + #1 | 1.57 | 0.51 | 9.54×10-5 | 2.48×10-6 | 2.59×10-3 | 1.55×10-4 |
| R31 | CH2#2 + H#1 ⇆ CH3#2 + #1 | 0.55 | -0.84 | 4.34×10-3 | 4.35×10-7 | 7.43×10-6 | 2.48×10-5 |
| R32 | CH2#2 + OH#1 ⇆ CH3#2 + O#1 | 0.74 | -1.07 | 4.55×101 | -4.47×10-9 | 2.87×10-3 | 1.36×10-7 |
| R33 | CH2#1 + OH#1 ⇆ CH3#1 + O#1 | 0.87 | 0.28 | 1.00 | -2.48×10-6 | 1.00 | 1.63×10-3 |
| R34 | CH3#2 + H#2 ⇆ CH4 (*p*1_CH4) + #2 + #2 | 1.15 | -1.64 | 4.43×10-6 | 1.52×10-6 | 1.27×10-3 | 1.32×10-7 |
| R35 | CH3#2 + OH#1 ⇆ CH4(*p*1_CH4)+ #2 + O#1 | 0.75 | -1.23 | 4.64×10-2 | 2.51×10-4 | 4.91×10-1 | 3.12×10-4 |
| R36 | CH3#2 + H#1 ⇆ CH4 (*p*1_CH4) + #2 + #1 | 1.27 | -1.00 | 4.43×10-6 | 3.59×10-6 | 1.27×10-3 | 3.47×10-7 |
| R37 | CH3#1 + H#2 ⇆ CH4 (*p*1_CH4) + #1 + #2 | 1.11 | -1.63 | 3.36×10-6 | 1.07×10-9 | 6.14×10-8 | 1.63×10-6 |
| R38 | CH3#1 + H#1 ⇆ CH4 (*p*1_CH4) + #1 + #1 | 1.68 | -0.99 | 3.36×10-6 | 8.19×10-13 | 6.14×10-8 | 1.40×10-9 |
| R39 | CH3#1 + OH#1 ⇆ CH4 (*p*1_CH4) + #1 + #1 | 0.79 | -1.22 | 3.53×10-2 | 4.29×10-8 | 2.37×10-5 | 1.82×10-3 |
| R40 | CHO#1 + CO#1 ⇆ CH#1 + CO2#1 | 1.14 | -0.63 | 3.39×10-1 | 7.15×10-15 | 5.55×10-1 | 6.07×10-15 |
| R41 | CH2O#1 + CO#1 ⇆ CH2#1 + CO2#1 | 1.93 | -0.78 | 2.74×10-5 | 5.44×10-16 | 1.21×10-3 | 6.83×10-16 |
| R42 | CH3O#1 + CO#1 ⇆ CH3#1 + CO2#1 | 2.59 | -0.25 | 3.12×10-9 | 1.10×10-18 | 3.75×10-6 | 1.38×10-18 |
| R43 | CHO#1 + CO#2 ⇆ CH#1 + CO2#2 | 2.35 | 0.31 | 3.39×10-1 | 5.45×10-22 | 5.55×10-1 | 4.14×10-22 |
| R44 | CH2O#1 + CO#2 ⇆ CH2#1 + CO2#2 | 2.55 | 0.17 | 3.27×10-5 | 1.56×10-18 | 1.44×10-3 | 1.75×10-18 |
| R45 | CH3O#1 + CO#2 ⇆ CH3#1 + CO2#2 | 3.32 | 0.70 | 3.73×10-9 | 4.42×10-22 | 4.48×10-6 | 4.97×10-22 |
| R46 | CH2#1 + CO#2 ⇆ CH2CO#1 + #2 | 0.50 | 0.28 | 8.78×10-1 | 2.22×10-3 | 1.00 | 1.15×10-4 |
| R47 | CH2#1 + CO#1 ⇆ CH2CO#1 + #1 | 0.88 | 0.46 | 8.78×10-1 | 1.37×10-8 | 1.00 | 7.88×10-10 |
| R48 | CH2#2 + CO#2 ⇆ CH2CO#2 + #2 | 0.20 | -0.63 | 5.25×101 | -4.31×10-7 | 5.94×101 | -2.49×10-5 |
| R49 | CH3#1 + CO#2 ⇆ CH3CO#1 + #2 | 0.62 | 0.50 | 4.81 | -1.91×10-8 | 5.41 | -3.39×10-5 |
| R50 | CH3#1 + CO#1 ⇆ CH3CO#1 + #1 | 0.97 | 0.67 | 4.02 | -1.60×10-13 | 4.53 | -3.19×10-10 |
| R51 | CH3#2 + CO#2 ⇆ CH3CO#2 + #2 | 0.53 | -0.10 | 1.00 | -3.91×10-14 | 1.00 | -2.52×10-12 |
| R52 | CH3CO#1 + #1 ⇆ CH2CO#1 + H#1 | 0.21 | -0.73 | 1.91×103 | -2.03×10-9 | 7.13×101 | -1.43×10-7 |
| R53 | CH3CO#1 + O#1 ⇆ CH2CO#1 + OH#1 | 0.00 | -0.40 | 1.09 | -1.71×10-8 | 1.10 | -3.37×10-5 |
| R54 | CH3CO#2 + #1 ⇆ CH2CO#2 + H#1 | 1.89 | 0.32 | 1.44×104 | -3.91×10-14 | 9.56×106 | -2.51×10-12 |
| R55 | CH3CO#2 + O#1 ⇆ CH2CO#2 + OH#1 | 2.31 | 0.54 | 1.15 | -9.88×10-19 | 2.07×104 | -1.16×10-14 |
| R56 | CH2CO#1 ⇆ CHCO (*p*1_CH2CO) + #1 | 0.00 | -0.64 | 9.97×10-1 | 2.22×10-3 | 1.00 | 8.06×10-5 |
| R57 | CH2CO#2 ⇆ CH2CO (*p*1_CH2CO) + #2 | 0.00 | -1.09 | 1.00 | -4.31×10-7 | 1.00 | -2.49×10-5 |
| R58 | CO#2 + O#1 ⇆ CO2#1 + #2 | 0.15 | 0.12 | 1.00 | 2.47×10-3 | 1.00 | 2.19×10-3 |
| R59 | CO#2 + OH#1 ⇆ COOH#2 + #1 | 1.78 | 1.48 | 1.00 | 9.89×10-17 | 1.00 | 2.37×10-15 |
| R60 | COOH#2 + O#1 ⇆ CO2#2 + OH#1 | 0.28 | -0.24 | 1.00 | 9.89×10-17 | 1.00 | 2.37×10-15 |
| R61 | COOH#2 + #1 ⇆ CO2#2 + H#1 | 3.73 | -0.47 | 1.05×104 | -3.39×10-33 | 3.86×102 | -3.33×10-33 |
| R62 | H#1 + OH#1 ⇆ H2O#1 + #1 | 1.89 | 1.89 | 3.70×10-4 | 4.82×10-7 | 3.97×10-3 | 1.43×10-5 |
| R63 | OH#1 + OH#1 ⇆ H2O#1 + O#1 | 1.64 | 1.64 | 2.71 | -4.89×10-7 | 1.07 | -1.45×10-5 |
| R64 | H#2 + OH#1 ⇆ H2O#1 + #2 | 1.96 | 1.23 | 2.59×10-4 | 6.87×10-9 | 2.78×10-3 | 1.83×10-7 |
| R65 | CO2#1 ⇆ CO2 + #1 | 0.38 | -0.24 | 1.00 | 2.47×10-3 | 1.00 | 2.19×10-3 |
| R66 | CO2#2 ⇆ CO2 + #2 | 0.00 | -1.36 | 1.00 | 1.00×10-16 | 1.00 | 2.37×10-15 |
| R67 | H2O#1 ⇆ H2O + #1 | 0.00 | -0.78 | 1.00 | 1.14×10-11 | 1.00 | 2.93×10-9 |
| R68 | Mass transfer process of CH2CO  (*p*1_CH2CO → *p*2_CH2CO) | 1.22 | 0.00 | 1.00 | 2.22×10-3 |  |  |
| R69 | Mass transfer process of CH4  (*p*1_CH4 → *p*2_CH4) | 1.37 | 0.00 | 1.00 | 1.71×10-4 |  |  |
| R70 | CH2CO diffusion to the pore of MOR  (*p*2_CH2CO → *p_*CH2CO_in) | 0.12 | 0.10 | 1.00 | 2.22×10-3 |  |  |
| R71 | CH2CO_in + H#3 ⇆ CH2CO···H#3 | 0.14 | -0.06 | 1.00 | 1.10×10-3 |  |  |
| R72 | CH2CO···H#3 ⇆ CH3CO+#3 | 0.07 | -0.46 | 1.00 | 1.10×10-3 |  |  |
| R73 | CH3CO+#3 ⇆ CH3#3 + CO_in | 1.82 | 0.85 | 7.50×10-1 | 1.10×10-3 |  |  |
| R74 | CH3#3 + CH2CO_in ⇆ CH3CH2CO+#3 | 1.04 | -0.73 | 2.04×10-3 | 1.10×10-3 |  |  |
| R75 | CH3CH2CO+#3 ⇆ CH3CH2#3 + CO_in | 1.36 | 0.20 | 6.76×10-1 | 1.10×10-3 |  |  |
| R76 | CH3CH2#3 ⇆ CH2CH2_in + H#3 | 1.23 | 0.67 | 1.00 | 1.09×10-3 |  |  |
| R77 | CH3CH2#3 + CH2CO_in ⇆ CH3CH2CH2CO+#3 | 1.45 | -0.21 | 9.99×10-5 | 1.51×10-5 |  |  |
| R78 | CH3CH2CH2CO+#3 ⇆ CH3CH2CH2#3 + CO_in | 1.11 | -0.01 | 4.56×10-1 | 1.51×10-5 |  |  |
| R79 | CH3CH2CH2#3 ⇆ CH3CHCH2_in + H#3 | 1.81 | 0.55 | 1.70×10-2 | 1.51×10-5 |  |  |
| R80 | CO_in ⇆ CO | 0.00 | -0.81 | 1.00 | 2.22×10-3 |  |  |
| R81 | CH2CH2_in ⇆ CH2CH2  (*p*CH2CH2_in → *p_*CH2CH2) | 0.00 | -0.64 | 1.00 | 1.08×10-3 |  |  |
| R82 | CH3CHCH2_in ⇆ CH3CHCH2 | 0.00 | -0.84 | 1.00 | 1.51×10-5 |  |  |
| R83 | CH4 diffusion to the outlet of MOR  (*p*2_CH4 → *p_*CH4) | 1.45 | 0.00 | 1.00 | 8.54×10-5 |  |  |

**Table S1-1.** Coverage (*θ*) over ZnCrOx coupled MOR catalyst.

| *θ*CH#1 | 7.15×10-8 | *θ*CH2#1 | 5.63×10-6 | *θ*CH2CO#1 | 6.00×10-14 | *θ*CH2O#1 | 3.78×10-6 |
| --- | --- | --- | --- | --- | --- | --- | --- |
| *θ*CH2OH#1 | 9.72×10-26 | *θ*CH3#1 | 1.32×10-11 | *θ*CH3CO#1 | 1.52×10-20 | *θ*CH3O#1 | 1.00×10-3 |
| *θ*CH3OH#1 | 3.38×10-19 | *θ*CHO#1 | 5.64×10-11 | *θ*CHOH#1 | 3.00×10-16 | *θ*CO#1 | 9.78×10-9 |
| *θ*CO2#1 | 2.01×10-7 | *θ*COH#1 | 7.07×10-22 | *θ*H#1 | 4.85×10-2 | *θ*H2#1 | 3.67×10-10 |
| *θ*H2O#1 | 6.01×10-20 | *θ*O#1 | 9.50×10-1 | *θ*OH#1 | 3.31×10-4 | *θ*#1 | 2.19×10-4 |
| *θ*CH2#2 | 1.22×10-14 | *θ*CH2CO#2 | 8.86×10-14 | *θ*CH3#2 | 3.84×10-8 | *θ*CH3CO#2 | 4.12×10-13 |
| *θ*CO#2 | 1.80×10-6 | *θ*CO2#2 | 1.90×10-12 | *θ*COOH#2 | 9.10×10-18 | *θ*H#2 | 2.41×10-3 |
| *θ*#2 | 9.98×10-1 | *θ*CH2CO···H#3 | 1.14×10-5 | *θ*CH3#3 | 2.20×10-3 | *θ*CH3CH2#3 | 4.54×10-2 |
| *θ*CH3CH2CH2#3 | 1.23×10-4 | *θ*CH3CH2CH2CO#3 | 8.27×10-10 | *θ*CH3CH2CO#3 | 8.79×10-6 | *θ*CH3CO#3 | 4.20×10-2 |
| *θ*H#3 | 9.10×10-1 |  |  |  |  |  |  |

**Table S1-2.** Degree of kinetic rate control (*X*RC,*i*) of some important elementary reaction steps for products (C2H4, CH3OH, CH4) in the syngas conversion over the ZnCrOx/MOR coupling system.

| Step *i* | *X*RC*,i* | | |
| --- | --- | --- | --- |
| C2H4 | CH3OH | CH4 |
| CH3O#1 + H#1 ⇆ CH3OH#1 + #1 | 0.00 | 1.00 | −0.00 |
| CHO#1 + #1 ⇆ CH#1 + O#1 | 0.22 | ‒0.37 | −0.20 |
| CH#1 + H#1 ⇆ CH2#1 + #1 | 0.11 | ‒0.19 | −0.10 |
| CH3O#1 + #2 ⇆ CH3#2 + O#1 | ‒0.09 | ‒0.05 | 0.97 |


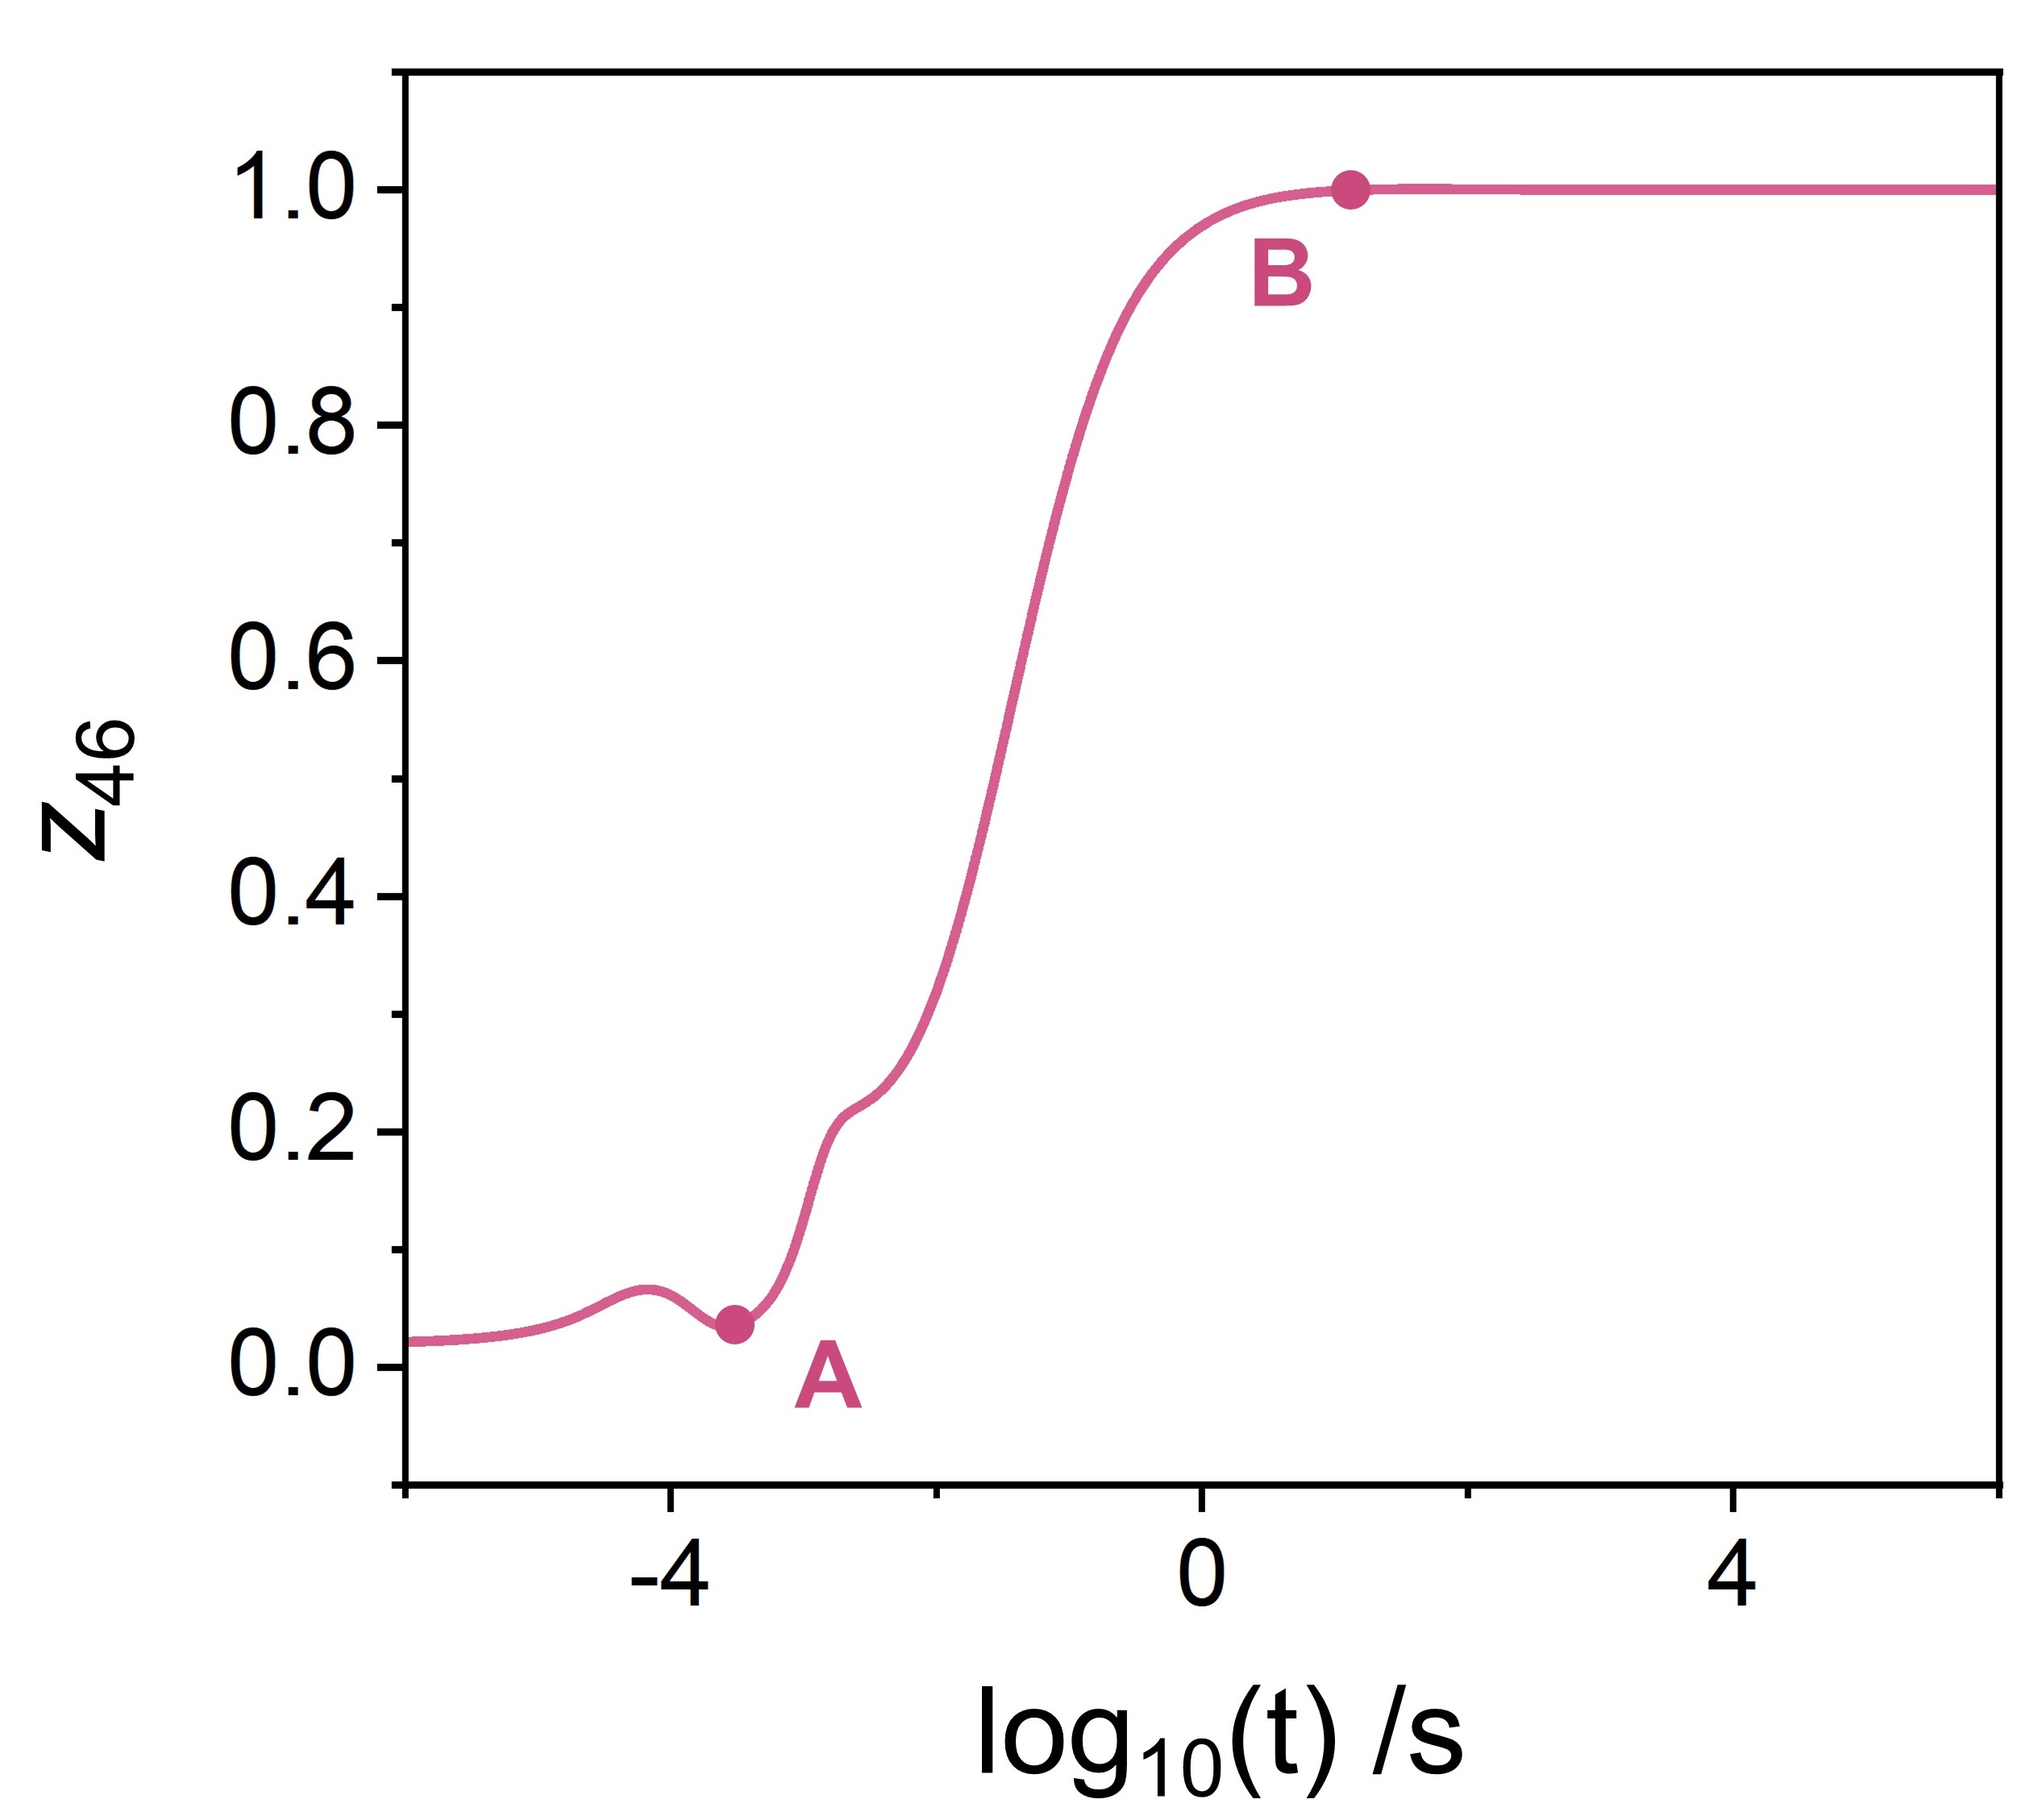


**Figure S3**. The dynamic evolution of the reversibility of step R46 (CH2#1 + CO#2 ⇆ CH2CO#1 + #2) in Table S1 over ZnCrOx/MOR catalytic system.

**Supplementary Information S3. Reaction rate equations and ordinary differential equations**

Based on the law of mass action, the reaction rate of each elementary step in Table S1 can be expressed as follows.

*r*R1 = *k*R1f**p*CO**θ*#1 − *k*R1r**θ*CO#1

*r*R2 = *k*R2f**p*CO**θ*#2 − *k*R2r**θ*CO#2

*r*R3 = *k*R3f**p*H2**θ*#1 – *k*R3r**θ*H2#1

*r*R4 = *k*R4f**θ*H2#1**θ*#2 − *k*R4r**θ*H#1**θ*H#2

*r*R5 = *k*R5f**θ*H#2**θ*#1 − *k*R5r**θ*H#1**θ*#2

*r*R6 = *k*R6f**θ*H#1**θ*CO#1 − *k*R6r**θ*#1**θ*CHO#1

*r*R7 = *k*R7f**θ*H#1**θ*CO#1 − *k*R7r**θ*#1**θ*COH#1

*r*R8 = *k*R8f**θ*H#1**θ*CHO#1 − *k*R8r**θ*#1**θ*CH2O#1

*r*R9 = *k*R9f**θ*H#1**θ*CHO#1 − *k*R9r**θ*#1**θ*CHOH#1

*r*R10 = *k*R10f**θ*H#1**θ*CH2O#1 − *k*R10r**θ*#1**θ*CH3O#1

*r*R11 = *k*R11f**θ*H#1**θ*CH2O#1 − *k*R11r**θ*#1**θ*CH2OH#1

*r*R12 = *k*R12f**θ*H#1**θ*COH#1 − *k*R12r**θ*#1**θ*CHOH#1

*r*R13 = *k*R13f**θ*H#1**θ*CHOH#1 − *k*R13r**θ*#1**θ*CH2OH#1

*r*R14 = *k*R14f**θ*H#1**θ*CH2OH#1 − *k*R14r**θ*#1**θ*CH3OH#1

*r*R15 = *k*R15f**θ*H#1**θ*CH3O#1 − *k*R15r**θ*#1**θ*CH3OH#1

*r*R16 = *k*R16f**θ*CH2O#1 − *k*R16r**p*CH2O**θ*#1

*r*R17 = *k*R17f**θ*CH3OH#1 − *k*R17r**p*CH3OH**θ*#1

*r*R18 = *k*R18f**θ*#1**θ*CHO#1 − *k*R18r**θ*O#1**θ*CH#1

*r*R19 = *k*R19f**θ*#1**θ*CH2O#1 − *k*R19r**θ*O#1**θ*CH2#1

*r*R20 = *k*R20f**θ*#2**θ*CH2O#1 − *k*R20r**θ*O#1**θ*CH2#2

*r*R21 = *k*R21f**θ*#1**θ*CHOH#1 − *k*R21r**θ*CH#1**θ*OH#1

*r*R22 = *k*R22f**θ*#1**θ*CH2OH#1 − *k*R22r**θ*CH2#1**θ*OH#1

*r*R23 = *k*R23f**θ*#2**θ*CH2OH#1 − *k*R23r**θ*CH2#2**θ*OH#1

*r*R24 = *k*R24f**θ*#1**θ*CH3O#1 − *k*R24r**θ*CH3#1**θ*O#1

*r*R25 = *k*R25f**θ*#2**θ*CH3O#1 − *k*R25r**θ*CH3#2**θ*O#1

*r*R26 = *k*R26f**θ*#1**θ*CH3OH#1 − *k*R26r**θ*CH3#1**θ*OH#1

*r*R27 = *k*R27f**θ*#2**θ*CH3OH#1 − *k*R27r**θ*CH3#2**θ*OH#1

*r*R28 = *k*R28f**θ*H#1**θ*CH#1 − *k*R28r**θ*#1**θ*CH2#1

*r*R29 = *k*R29f**θ*CH#1**θ*OH#1 − *k*R29r**θ*O#1**θ*CH2#1

*r*R30 = *k*R30f**θ*H#1**θ*CH2#1 − *k*R30r**θ*#1**θ*CH3#1

*r*R31 = *k*R31f**θ*H#1**θ*CH2#2 − *k*R31r**θ*#1**θ*CH3#2

*r*R32 = *k*R32f**θ*OH#1**θ*CH2#2 − *k*R32r**θ*O#1**θ*CH3#2

*r*R33 = *k*R33f**θ*CH2#1**θ*OH#1 − *k*R33r**θ*O#1**θ*CH3#1

*r*R34 = *k*R34f**θ*H#2**θ*CH3#2 − *k*R34r**p*CH4**θ*#22

*r*R35 = *k*R35f**θ*OH#1**θ*CH3#2 − *k*R35r**p*CH4**θ*O#1**θ*#2

*r*R36 = *k*R36f**θ*H#1**θ*CH3#2 − *k*R36r**p*CH4**θ*#1**θ*#2

*r*R37 = *k*R37f**θ*H#2**θ*CH3#1 − *k*R37r**p*CH4**θ*#1**θ*#2

*r*R38 = *k*R38f**θ*H#1**θ*CH3#1 − *k*R38r**p*CH4**θ*#12

*r*R39 = *k*R39f**θ*OH#1**θ*CH3#1 − *k*R39r**p*CH4**θ*O#1**θ*#1

*r*R40 = *k*R40f**θ*CO#1**θ*CHO#1 − *k*R40r**θ*CH#1**θ*CO2#1

*r*R41 = *k*R41f**θ*CO#1**θ*CH2O#1 − *k*R41r**θ*CH2#1**θ*CO2#1

*r*R42 = *k*R42f**θ*CO#1**θ*CH3O#1 − *k*R42r**θ*CH3#1**θ*CO2#1

*r*R43 = *k*R43f**θ*CO#2**θ*CHO#1 − *k*R43r**θ*CH#1**θ*CO2#2

*r*R44 = *k*R44f**θ*CO#2**θ*CH2O#1 − *k*R44r**θ*CH2#1**θ*CO2#2

*r*R45 = *k*R45f**θ*CO#2**θ*CH3O#1 − *k*R45r**θ*CH3#1**θ*CO2#2

*r*R46 = *k*R46f**θ*CO#2**θ*CH2#1 − *k*R46r**θ*#2**θ*CH2CO#1

*r*R47 = *k*R47f**θ*CO#1**θ*CH2#1 − *k*R47r**θ*#1**θ*CH2CO#1

*r*R48 = *k*R48f**θ*CO#2**θ*CH2#2 − *k*R48r**θ*#2**θ*CH2CO#2

*r*R49 = *k*R49f**θ*CO#2**θ*CH3#1 − *k*R49r**θ*#2**θ*CH3CO#1

*r*R50 = *k*R50f**θ*CO#1**θ*CH3#1 − *k*R50r**θ*#1**θ*CH3CO#1

*r*R51 = *k*R51f**θ*CO#2**θ*CH3#2 − *k*R51r**θ*#2**θ*CH3CO#2

*r*R52 = *k*R52f**θ*#1**θ*CH3CO#1 − *k*R52r**θ*H#1**θ*CH2CO#1

*r*R53 = *k*R53f**θ*O#1**θ*CH3CO#1 – *k*R53r**θ*OH#1**θ*CH2CO#1

*r*R54 = *k*R54f**θ*#1**θ*CH3CO#2 − *k*R54r**θ*H#1**θ*CH2CO#2

*r*R55 = *k*R55f**θ*O#1**θ*CH3CO#2 – *k*R55r**θ*OH#1**θ*CH2CO#2

*r*R56 = *k*R56f**θ*CH2CO#1 − *k*R56r**p*CH2CO_1**θ*#1

*r*R57 = *k*R57f**θ*CH2CO#2 − *k*R57r**p*CH2CO_1**θ*#2

*r*R58 = *k*R58f**θ*O#1**θ*CO#2 − *k*R58r**θ*#2**θ*CO2#1

*r*R59 = *k*R59f**θ*CO#2**θ*OH#1 − *k*R59r**θ*#1**θ*COOH#2

*r*R60 = *k*R60f**θ*O#1**θ*COOH#2 − *k*R60r**θ*OH#1**θ*CO2#2

*r*R61 = *θ*#1**θ*COOH#2**k*R61f − *θ*H#1**θ*CO2#2**k*R61r

*r*R62 = *k*R62f**θ*H#1**θ*OH#1 − *k*R62r**θ*#1**θ*H2O#1

*r*R63 = *k*R63f**θ*OH#12 − *k*R63r**θ*O#1**θ*H2O#1

*r*R64 = *k*R64f**θ*H#2**θ*OH#1 − *k*R64r**θ*#2**θ*H2O#1

*r*R65 = *k*R65f**θ*CO2#1 − *k*R65r**p*CO2**θ*#1

*r*R66 = *k*R66f**θ*CO2#2 − *k*R66r**p*CO2**θ*#2

*r*R67 = *k*R67f**θ*H2O#1 – *k*R67r**p*H2O**θ*#1

*r*R68 = *D*CH2CO**A***N*A**p◦*/(*R***T**∆*l*)*(*p*1_CH2CO – *p*2_CH2CO)

*r*R69 = *D*CH4**A***N*A**p◦*/(*R***T**∆*l*)*(*p*1_CH4 – *p*2_CH4)

*r*R70 = *k*R70f**p*2_CH2CO − *k*R70r**p*CH2CO_in

*r*R71 = *k*R71f**p*CH2CO_in**θ*H#3 − *k*R71r**θ*CH2CO‧‧‧H#3

*r*R72 = *k*R72f**θ*CH2CO‧‧‧H#3 − *k*R72r**θ*CH3CO+#3

*r*R73 = *k*R73f**θ*CH3CO+#3 − *k*R73r**p*CO_in**θ*CH3#3

*r*R74 = *k*R74f**p*CH2CO_in**θ*CH3#3 − *k*R74r**θ*CH3CH2CO+#3

*r*R75 = *k*R75f**θ*CH3CH2CO+#3 − *k*R75r**p*CO_in**θ*CH3CH2#3

*r*R76 = *k*R76f**θ*CH3CH2#3 − *k*R76r**p*CH2CH2_in**θ*H#3

*r*R77 = *k*R77f**p*CH2CO_in**θ*CH3CH2#3 − *k*R77r**θ*CH3CH2CH2CO+#3

*r*R78 = *k*R78f**θ*CH3CH2CH2CO+#3 − *k*R78r**p*CO_in**θ*CH3CH2CH2#3

*r*R79 = *k*R79f**θ*CH3CH2CH2#3 − *k*R79r**p*CH3CH2CH2_in**θ*H#3

*r*R80 = *k*R80f**p*CO_in − *k*R80r**p*CO

*r*R81 = *k*R81f**p*CH2CH2_in − *k*R81r**p*CH2CH2

*r*R82 = *k*R82f**p*CH3CH2CH2_in − *k*R82r**p*CH3CH2CH2

*r*R83 = *D*CH4**A***N*A**p◦*/(*R***T**∆*l*)*(*p*2_CH4 – *p*CH4)

*r*D1 = −(*F***p◦**(*p*CH2CH2 − *p*o_CH2CH2))/(*N*A**T***k*B)

*r*D2 = −(*F***p◦**(*p*CH2CH2_in − *p*o_CH2CH2_in))/(*N*A**T***k*B)

*r*D3 = −(*F***p◦**(*p*CH2CHCH3 − *p*o_CH2CHCH3))/(*N*A**T***k*B)

*r*D4 = −(*F***p*0*(*p*CH2CHCH3_in − *p*o_CH2CHCH3_in))/(*N*A**T***k*B)

*r*D5 = −(*F***p◦**(*p*1_CH2CO − *p*o_1_CH2CO))/(*N*A**T***k*B)

*r*D6 = −(*F***p◦**(*p*2_CH2CO − *p*o_2_CH2CO))/(*N*A**T***k*B)

*r*D7 = −(*F***p◦**(*p*CH2CO_in − *p*o_CH2CO_in))/(*N*A**T***k*B)

*r*D8 = −(*F***p◦**(*p*CH2O − *p*o_CH2O))/(*N*A**T***k*B)

*r*D9 = −(*F***p◦**(*p*CH3OH − *p*o_CH3OH))/(*N*A**T***k*B)

*r*D10 = −(*F***p◦**(*p*1_CH4 − *p*o_1_CH4))/(*N*A**T***k*B)

*r*D11 = −(*F***p◦**(*p*2_CH4 − *p*o_2_CH4))/(*N*A**T***k*B)

*r*D12 = −(*F***p◦**(*p*CH4 − *p*o_CH4))/(*N*A**T***k*B)

*r*D13 = −(*F***p◦**(*p*CO − *p*o_CO))/(*N*A**T***k*B)

*r*D14 = −(*F***p◦**(*p*CO2 − *p*o_CO2))/(*N*A**T***k*B)

*r*D15 = −(*F***p◦**(*p*CO_in − *p*o_CO_in))/(*N*A**T***k*B)

*r*D16 = −(*F***p◦**(*p*H2 − *p*o_H2))/(*N*A**T***k*B)

*r*D17 = −(*F***p◦**(*p*H2O − *p*o_H2O))/(*N*A**T***k*B)

where *rRi* and *rDi* represent the reaction rate equations of elementary steps *i* and the diffusion rate equations of gas species, respectively. and stand for the forward and reverse reaction rate constants of steps *i*, respectively. is the partial pressure of species *i*. represents the coverage of intermediate *i* on site *j* (*j* = 1, 2, 3) and is the free site. *F* is the space velocity and *p◦* is the standard atmospheric pressure. *NA*, *D,* ∆*l* and *A* are the Avogadro constant, the diffusion coefficient, the proximity of ZnCrOx/MOR and and the cross-section area, respectively.

Further, we can formulate the ordinary differential equations at the steady state as follows.

*dθ*CH#1/*dt* = *r*R18 + *r*R21 − *r*R28 − *r*R29 + *r*R40 + *r*R43

*dθ*CH2#1/*dt* = *r*R19 + *r*R22 + *r*R28 + *r*R29 − *r*R30 − *r*R33 + *r*R41 + *r*R44 − *r*R46 − *r*R47

*dθ*CH2CO#1/*dt* = *r*R46 + *r*R47 + *r*R52 + *r*R53 − *r*R56

*dθ*CH2O#1/*dt* = *r*R8 − *r*R10 − *r*R11 − *r*R16 − *r*R19 − *r*R20 − *r*R41 − *r*R44

*dθ*CH2OH#1/*dt* = *r*R11 + *r*R13 − *r*R14 − *r*R22 − *r*R23

*dθ*CH3#1/*dt* = *r*R24 + *r*R26 + *r*R30 + *r*R33 − *r*R37 − *r*R38 − *r*R39 + *r*R42 + *r*R45 − *r*R49 − *r*R50

*dθ*CH3CO#1/*dt* = *r*R49 + *r*R50 − *r*R52 − *r*R53

*dθ*CH3O#1/*dt* = *r*R10 − *r*R15 − *r*R24 − *r*R25 − *r*R42 − *r*R45

*dθ*CH3OH#1/*dt* = *r*R14 + *r*R15 − *r*R17 − *r*R26 − *r*R27

*dθ*CHO#1/*dt* = *r*R6 − *r*R8 − *r*R9 − *r*R18 − *r*R40 − *r*R43

*dθ*CHOH#1/*dt* = *r*R9 + *r*R12 − *r*R13 − *r*R21

*dθ*CO#1/*dt* = *r*R1 − *r*R6 − *r*R7 − *r*R40 − *r*R41 − *r*R42 − *r*R47 − *r*R50

*dθ*CO2#1/*dt* = *r*R40 + *r*R41 + *r*R42 + *r*R58 − *r*R65

*dθ*COH#1/*dt* = *r*R7 − *r*R12

*dθ*H#1/*dt* = *r*R4 + *r*R5 − *r*R6 − *r*R7 − *r*R8 − *r*R9 − *r*R10 − *r*R11 − *r*R12 − *r*R13 − *r*R14 − *r*R15 − *r*R28 − *r*R30 − *r*R31 − *r*R36 − *r*R38 + *r*R52 + *r*R54 + *r*R61 − *r*R62

*dθ*H2#1/*dt* = *r*R3 − *r*R4

*dθ*H2O#1/*dt* = *r*R62 + *r*R63 + *r*R64 − *r*R67

*dθ*O#1/*dt* = *r*R18 + *r*R19 + *r*R20 + *r*R24 + *r*R25 + *r*R29 + *r*R32 + *r*R33 + *r*R35 + *r*R39 − *r*R53 − *r*R55 − *r*R58 − *r*R60 + *r*R63

*dθ*OH#1/*dt* = *r*R21 + *r*R22 + *r*R23 + *r*R26 + *r*R27 − *r*R29 − *r*R32 − *r*R33 − *r*R35 − *r*R39 + *r*R53 + *r*R55 − *r*R59 + *r*R60 − *r*R62 − 2**r*R63 − *r*R64

*dθ*#1/*dt* = *r*R6 − *r*R3 − *r*R5 − *r*R1 + *r*R7 + *r*R8 + *r*R9 + *r*R10 + *r*R11 + *r*R12 + *r*R13 + *r*R14 + *r*R15 + *r*R16 + *r*R17 − *r*R18 − *r*R19 − *r*R21 − *r*R22 − *r*R24 − *r*R26 + *r*R28 + *r*R30 + *r*R31 + *r*R36 + *r*R37 + 2**r*R38 + *r*R39 + *r*R47 + *r*R50 − *r*R52 − *r*R54 + *r*R56 + *r*R59 − *r*R61 + *r*R62 + *r*R65 + *r*R67

*d**θ*CH2#2/*dt* = *r*R20 + *r*R23 − *r*R31 − *r*R32 − *r*R48

*dθ*CH2CO#2/*dt* = *r*R48 + *r*R54 + *r*R55 − *r*R57

*dθ*CH3#2/*dt* = *r*R25 + *r*R27 + *r*R31 + *r*R32 − *r*R34 − *r*R35 − *r*R36 − *r*R51

*dθ*CH3CO#2/*dt* = *r*R51 − *r*R54 − *r*R55

*dθ*CO#2/*dt* = *r*R2 − *r*R43 − *r*R44 − *r*R45 − *r*R46 − *r*R48 − *r*R49 − *r*R51 − *r*R58 − *r*R59

*dθ*CO2#2/*dt* = *r*R43 + *r*R44 + *r*R45 + *r*R60 + *r*R61 − *r*R66

*dθ*COOH#2/*dt* = *r*R59 − *r*R60 − *r*R61

*dθ*H#2/*dt* = *r*R4 − *r*R5 − *r*R34 − *r*R37 − *r*R64

*dθ*#2/*dt* = *r*R5 − *r*R4 − *r*R2 − *r*R20 − *r*R23 − *r*R25 − *r*R27 + 2**r*R34 + *r*R35 + *r*R36 + *r*R37 + *r*R46 + *r*R48 + *r*R49 + *r*R51 + *r*R57 + *r*R58 + *r*R64 + *r*R66

*dθ*CH2CO‧‧‧H#3/*dt* = *r*R71 − *r*R72

*d**θ*CH3#3/*dt* = *r*R73 − *r*R74

*dθ*CH3CH2#3/*dt* = *r*R75 − *r*R76 − *r*R77

*dθ*CH3CH2CH2#3/*dt* = *r*R78 − *r*R79

*dθ*CH3CH2CH2CO#3/*dt* = *r*R77 − *r*R78

*dθ*CH3CH2CO#3/*dt* = *r*R74 − *r*R75

*dθ*CH3CO#3/*dt* = *r*R72 − *r*R73

*dθ*#3/*dt* = *r*R76 − *r*R71 + *r*R79

*d**p*CH2CH2/*dt* = Pn*(*r*R81 + *r*D1)

*dp*CH2CH2_in/*dt* = Pn*(*r*R76 − *r*R81 + *r*D2)

*dp*CH2CHCH3/*dt* = Pn*(*r*R82 + *r*D3)

*dp*CH2CHCH3_in/*dt* = Pn*(*r*R79 − *r*R82 + *r*D4)

*d**p*1_CH2CO/*dt* = Pn*(*r*R56 + *r*R57 − *r*R68 + *r*D5)

*dp*2_CH2CO/*dt* = Pn*(*r*R68 − *r*R70 + *r*D6)

*dp*CH2CO_in/*dt* = −Pn*(*r*R71 − *r*R70 + *r*R74 + *r*R77 − *r*D7)

*dp*CH2O/*dt* = Pn*(*r*R16 + *r*D8)

*dp*CH3OH/*dt* = Pn*(*r*R17 + *r*D9)

*dp*1_CH4/*dt* = Pn*(*r*R34 + *r*R35 + *r*R36 + *r*R37 + *r*R38 + *r*R39 − *r*R69 + *r*D10)

*dp*2_CH4/*dt* = Pn*(*r*R69 − *r*R83 + *r*D11)

*dp*CH4/*dt* = Pn*(*r*R83 + *r*D12)

*d**p*CO/*dt* = −Pn*(*r*R1 + *r*R2 − *r*R80 − *r*D13)

*dp*CO2/*dt* = Pn*(*r*R65 + *r*R66 + *r*D14)

*dp*CO_in/*dt* = Pn*(*r*R73 + *r*R75 + *r*R78 − *r*R80 + *r*D15)

*dp*H2/*dt* = −Pn*(*r*R3 − *r*D16)

*dp*H2O/*dt* = Pn*(*r*R67 + *r*D17)

where Pn is the normalized total relative pressure of gas.


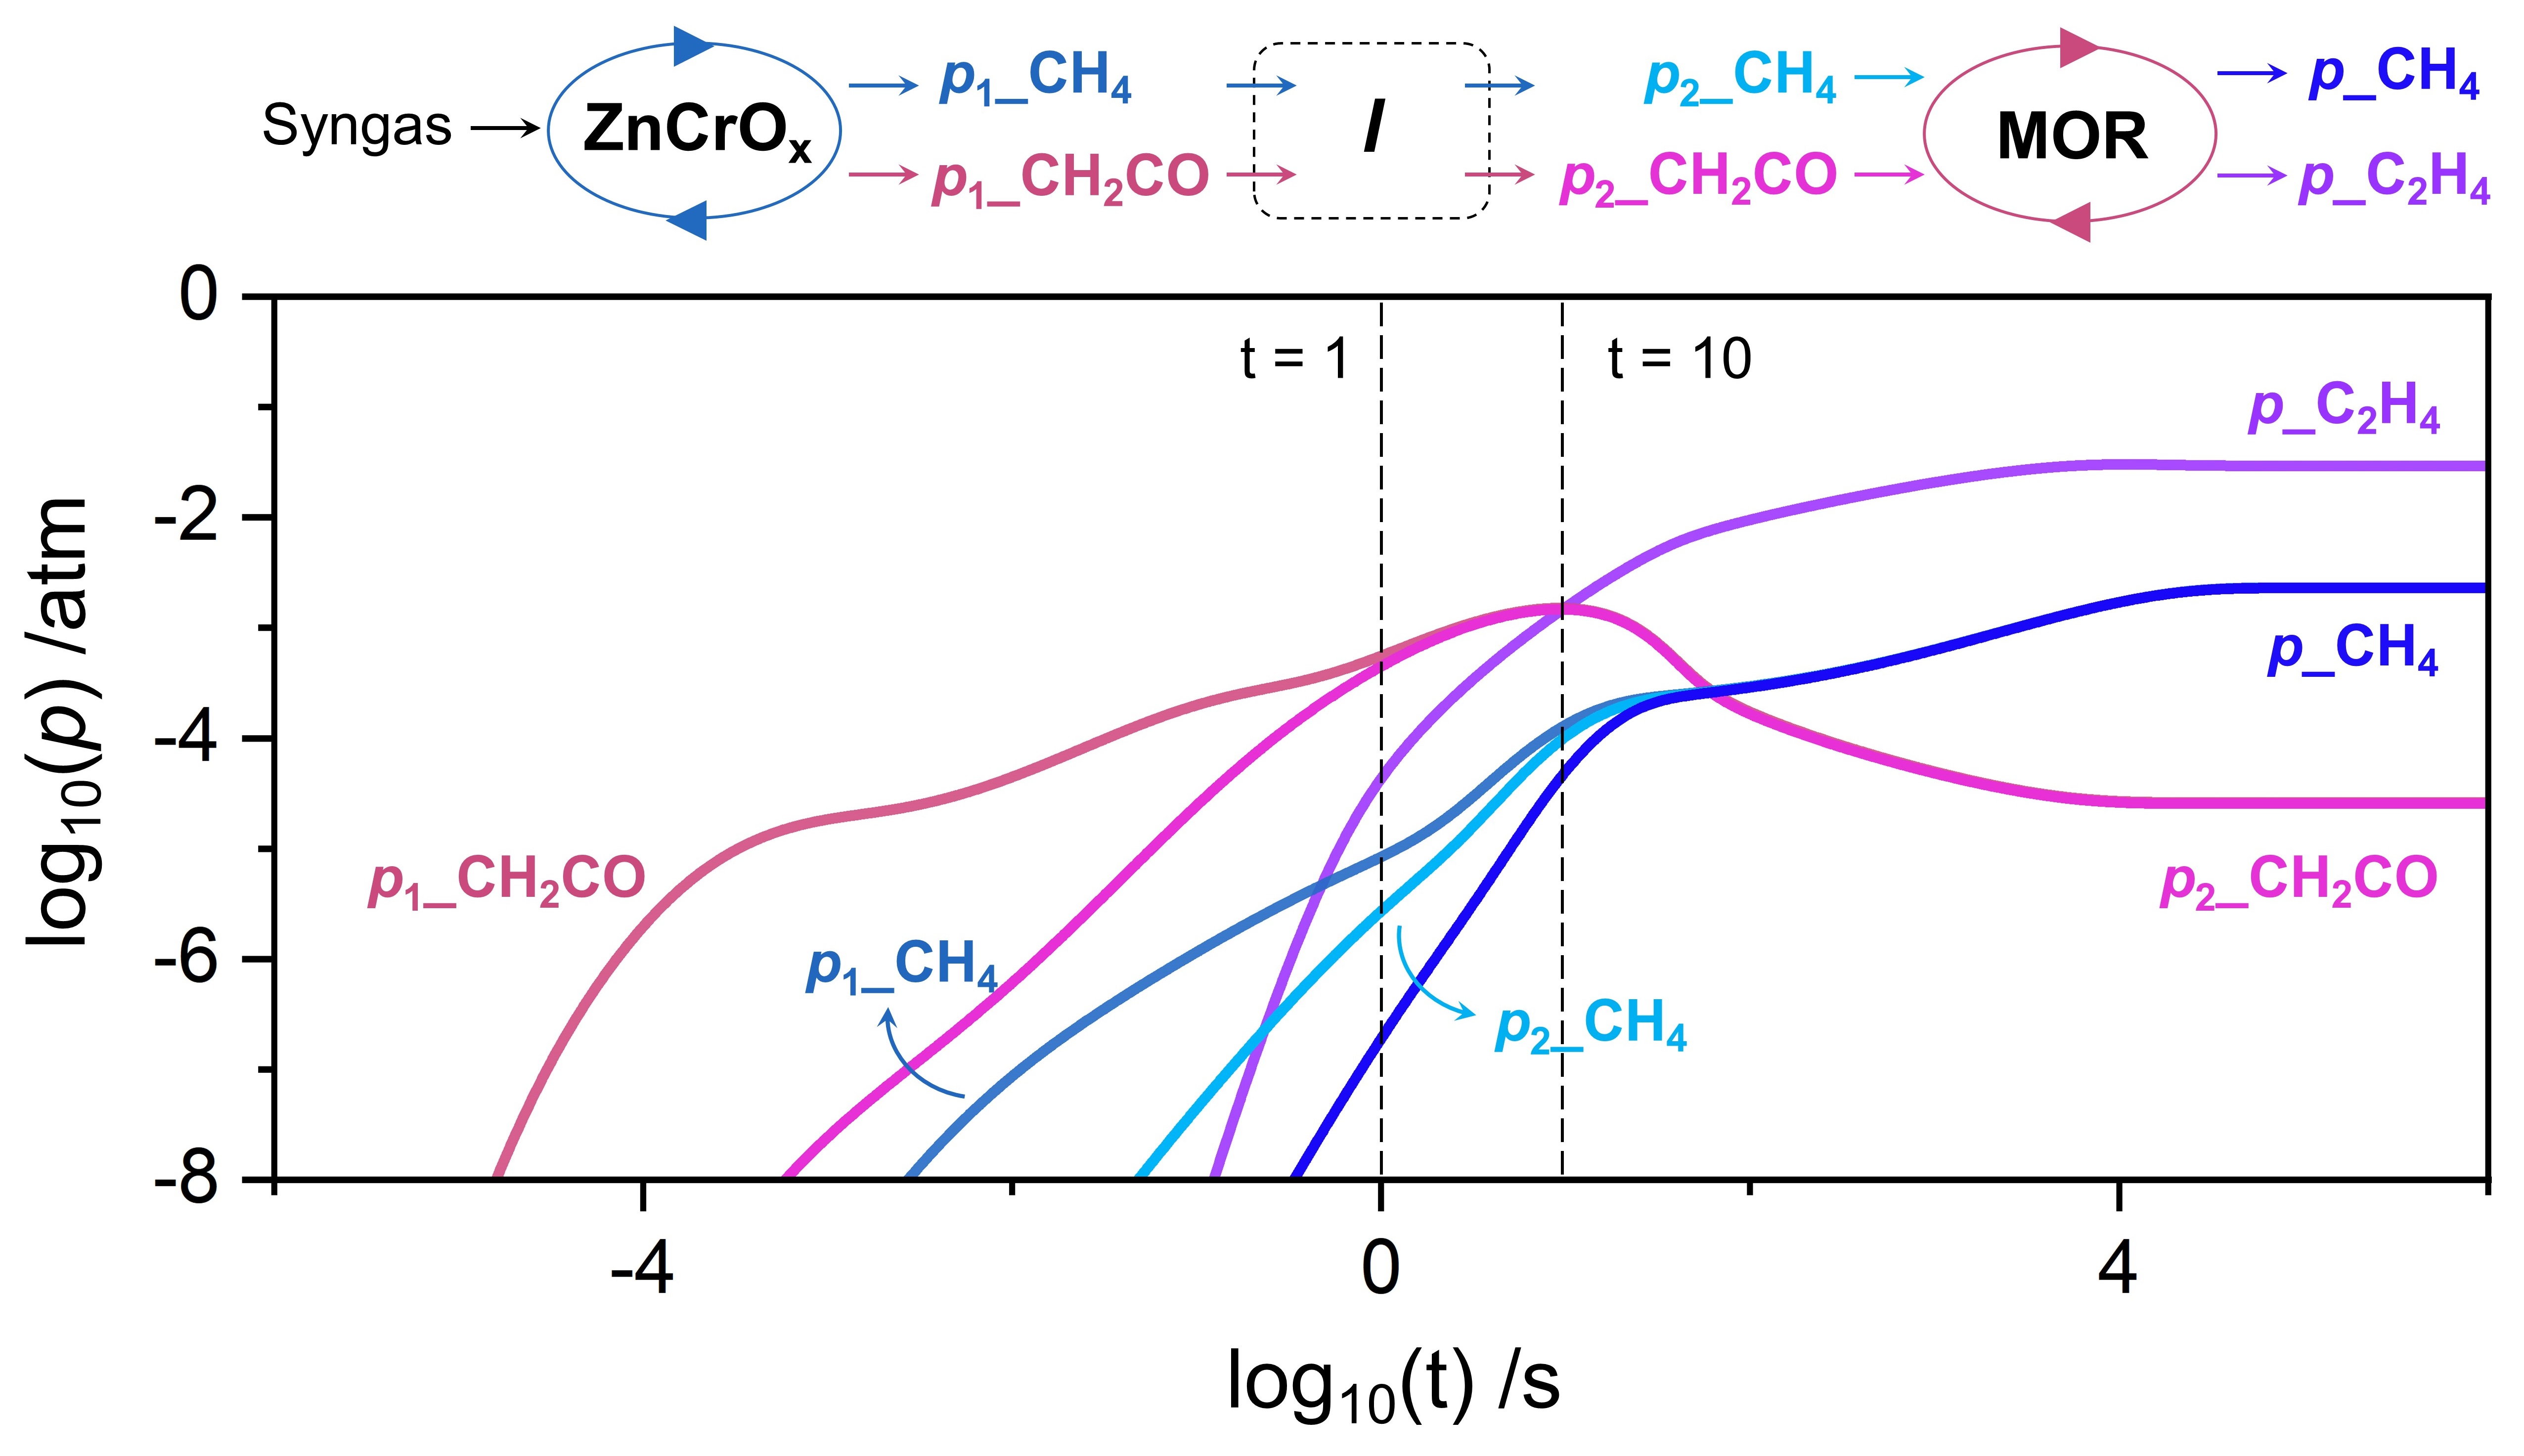


**Figure S4**. The dynamic evolution of gas species concentration over ZnCrOx/MOR catalytic system, including CH4 (*p*1_CH4) and CH2CO (*p*1_CH2CO) on ZnCrOx, CH4 (*p*2_CH4) and CH2CO (*p*2_CH2CO) at the MOR inlet, C2H4 (*p*_C2H4) and CH4 (*p*_CH4) at the MOR outlet.


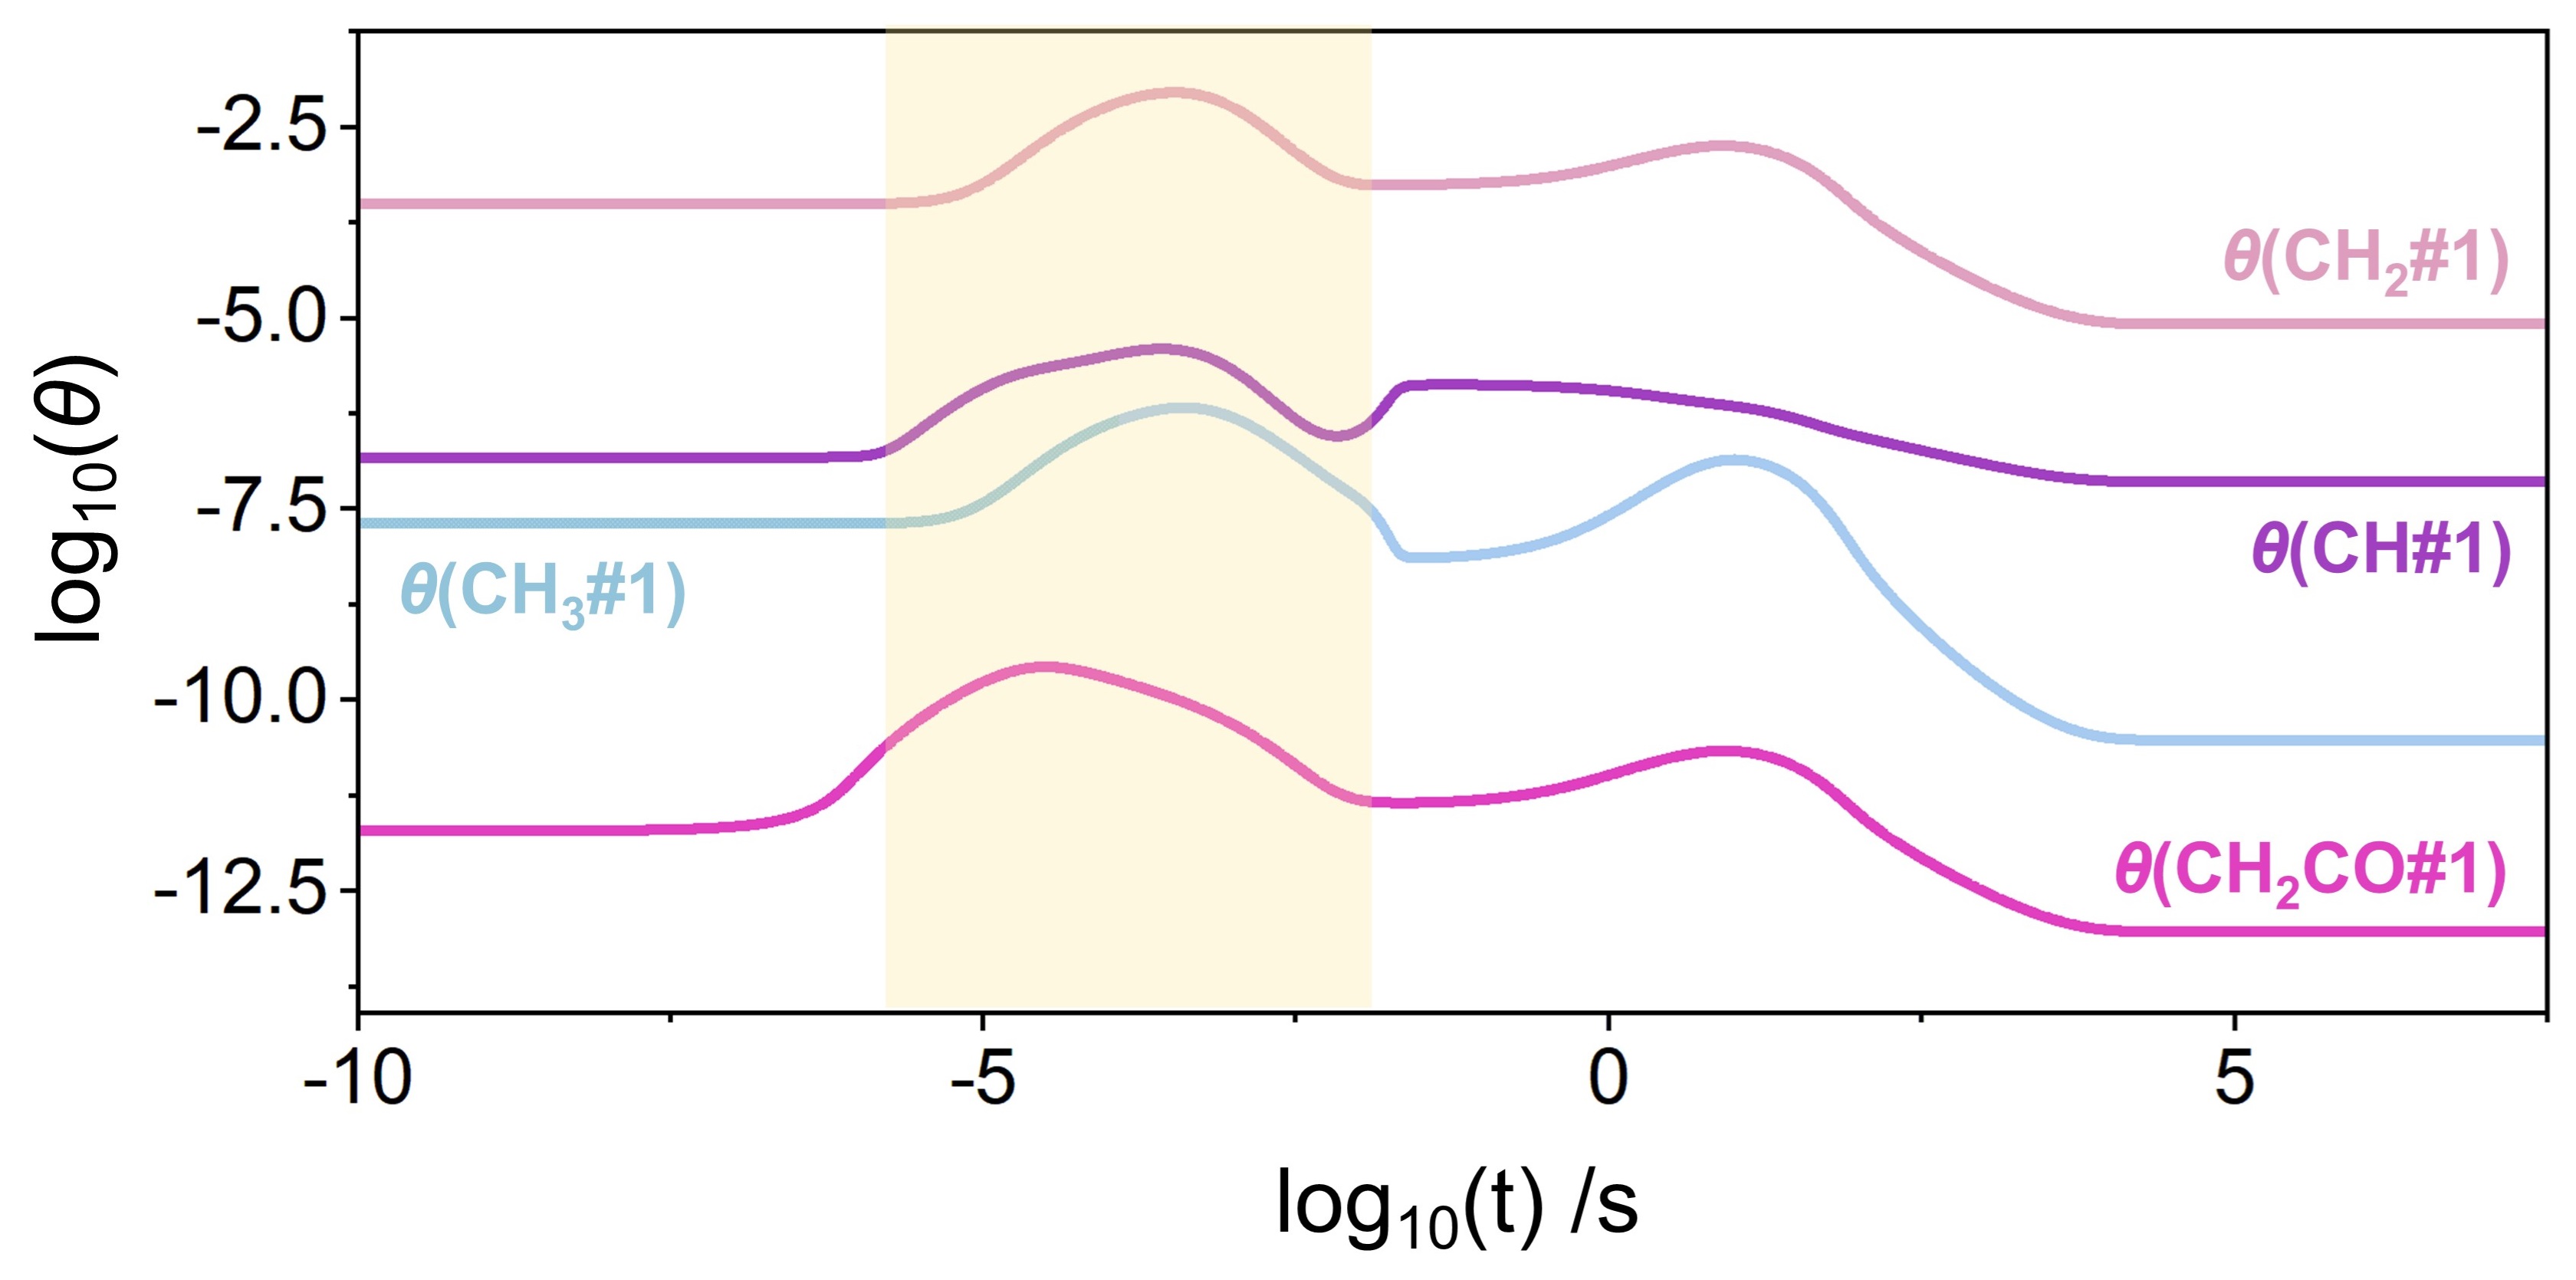


**Figure S5**. The dynamic evolution of the coverages of key intermediates by coupling MOR with the ZnCrOx surface under the steady state condition.


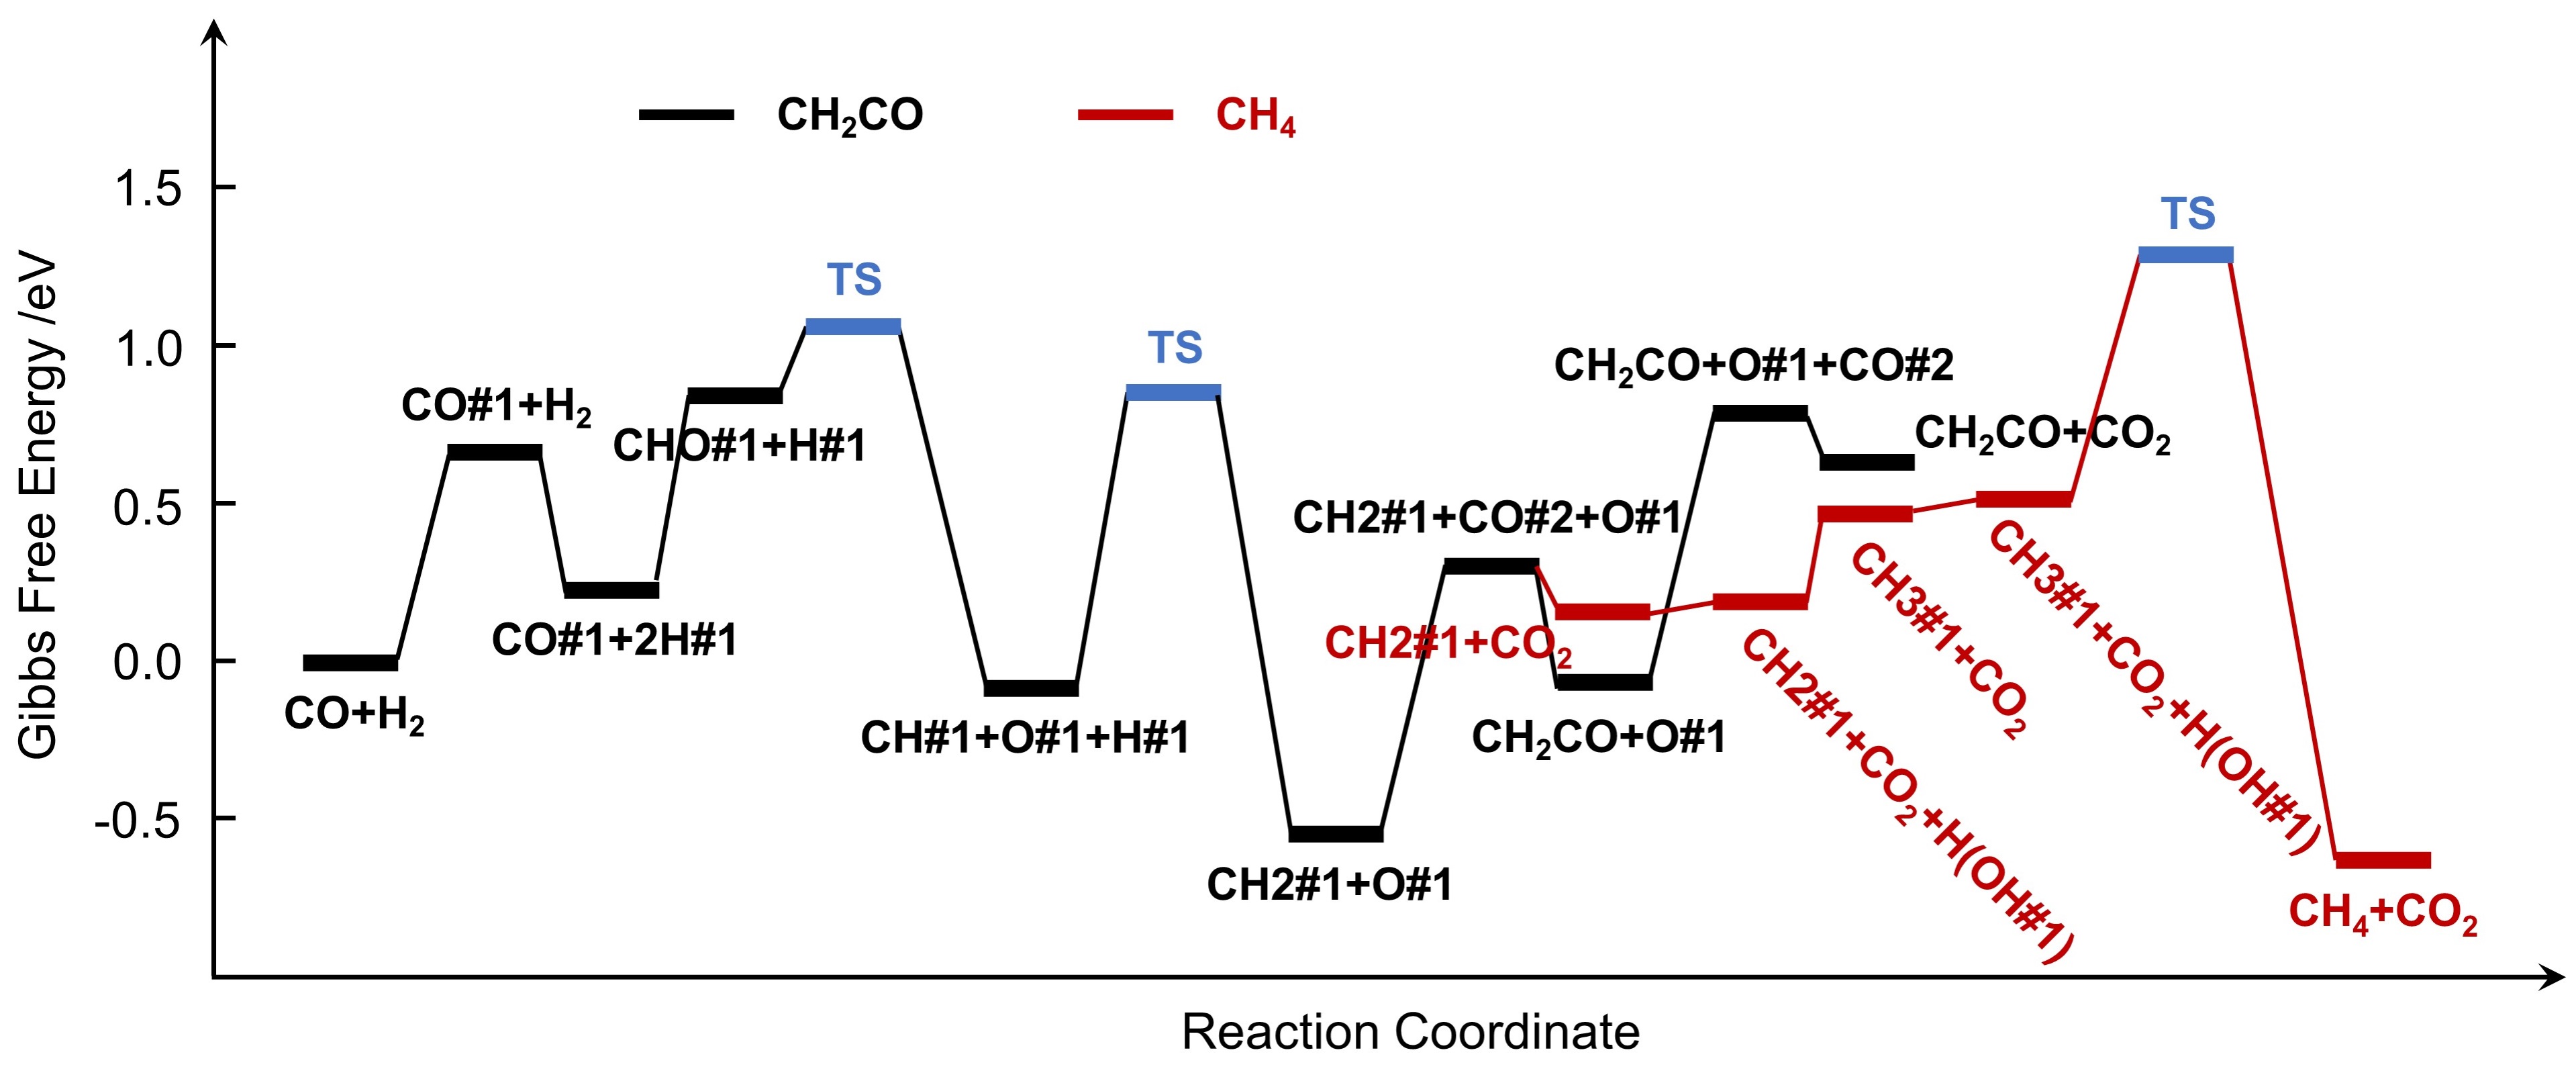


**Figure S6**. The Gibbs free energy profiles of selective syngas conversion to CH2CO and CH4 over ZnCrOx surface. Notaby, the blue horizontal bars represent the transition state where the corresponding reaction step is irreversible. The remaining steps arrive the equilibrium.

**Supplementary Information S4. Derivation of the overall reaction rate**

Based on the kinetic data at steady state condition in Table S1, we can see that CO can easily react with dissociated H to form CHO due to their kinetic quasi-equilibrium (*Zi* ≈ 1, *i* = 1, 3–6) and the dissociation of CHO is the rate-limiting step of C2H4 formation over ZnCrOx/MOR (*Z*18 ≈ 3.39×10-1), verified by the *X*RC,*i* in Table S1-2. Thus, the formation rate of C2H4 can be expressed as:

(S1)

Because the processes of H2 adsorption and dissociation (*Zi* ≈ 1, *i* = 3–5), CO adsorption and hydrogenation (*Zi* ≈ 1, *i* = 1, 6) have achieved the quasi-equilibrium, we can obtain:

(S2)

(S3)

(S4)

(S5)

(S6)

where and stand for the forward and reverse reaction rate constants of steps *i*, respectively. is the partial pressure of species *i*. represents the coverage of intermediate *i* on site *j* (*j* = 1, 2) and is the free site. Substituting equations (S2)-(S6) into (S1), *r*C2H4 can be written as:

(S7)

where represents the equilibrium constant of steps *i*. is defined as the effective energy barrier of C2H4 formation and expressed as .

Similarly, the effective energy barrier of CH4 formation on ZnCrOx/MOR catalytic system can be derived. From Table S1-2, one can see that the rate-limiting step of CH4 formation is the dissociation of CH3O#1 on ZnCrOx. Thus, the formation rate of CH4 can be expressed as:

(S8)

Because the processes of CHO#1 hydrogenation to CH3O#1 (*Zi* ≈ 1, *i* = 8, 10) have achieved the quasi-equilibrium, we can obtain:

(S9)

(S10)

Substituting equations (S2)-(S6) and (S9)-(S10) into (S8), *r*CH4 can be expressed as:

(S11)

where is defined as the effective energy barrier of CH4 formation and expressed as .

According to the transition state theory, and can be formulated as:

(S12)

(S13)

where and represent the Gibbs free energy and Gibbs free energy barrier of steps *i*, respectively. Thus, under the steady state, substituting the energetics (Table S1) of the corresponding elementary and the coverage and (Table S1-1) into equations (7) and (11), the effective energy barriers of C2H4 and CH4 formation can be obtained, which is approximately 2.20 eV and 2.50 eV, respectively.


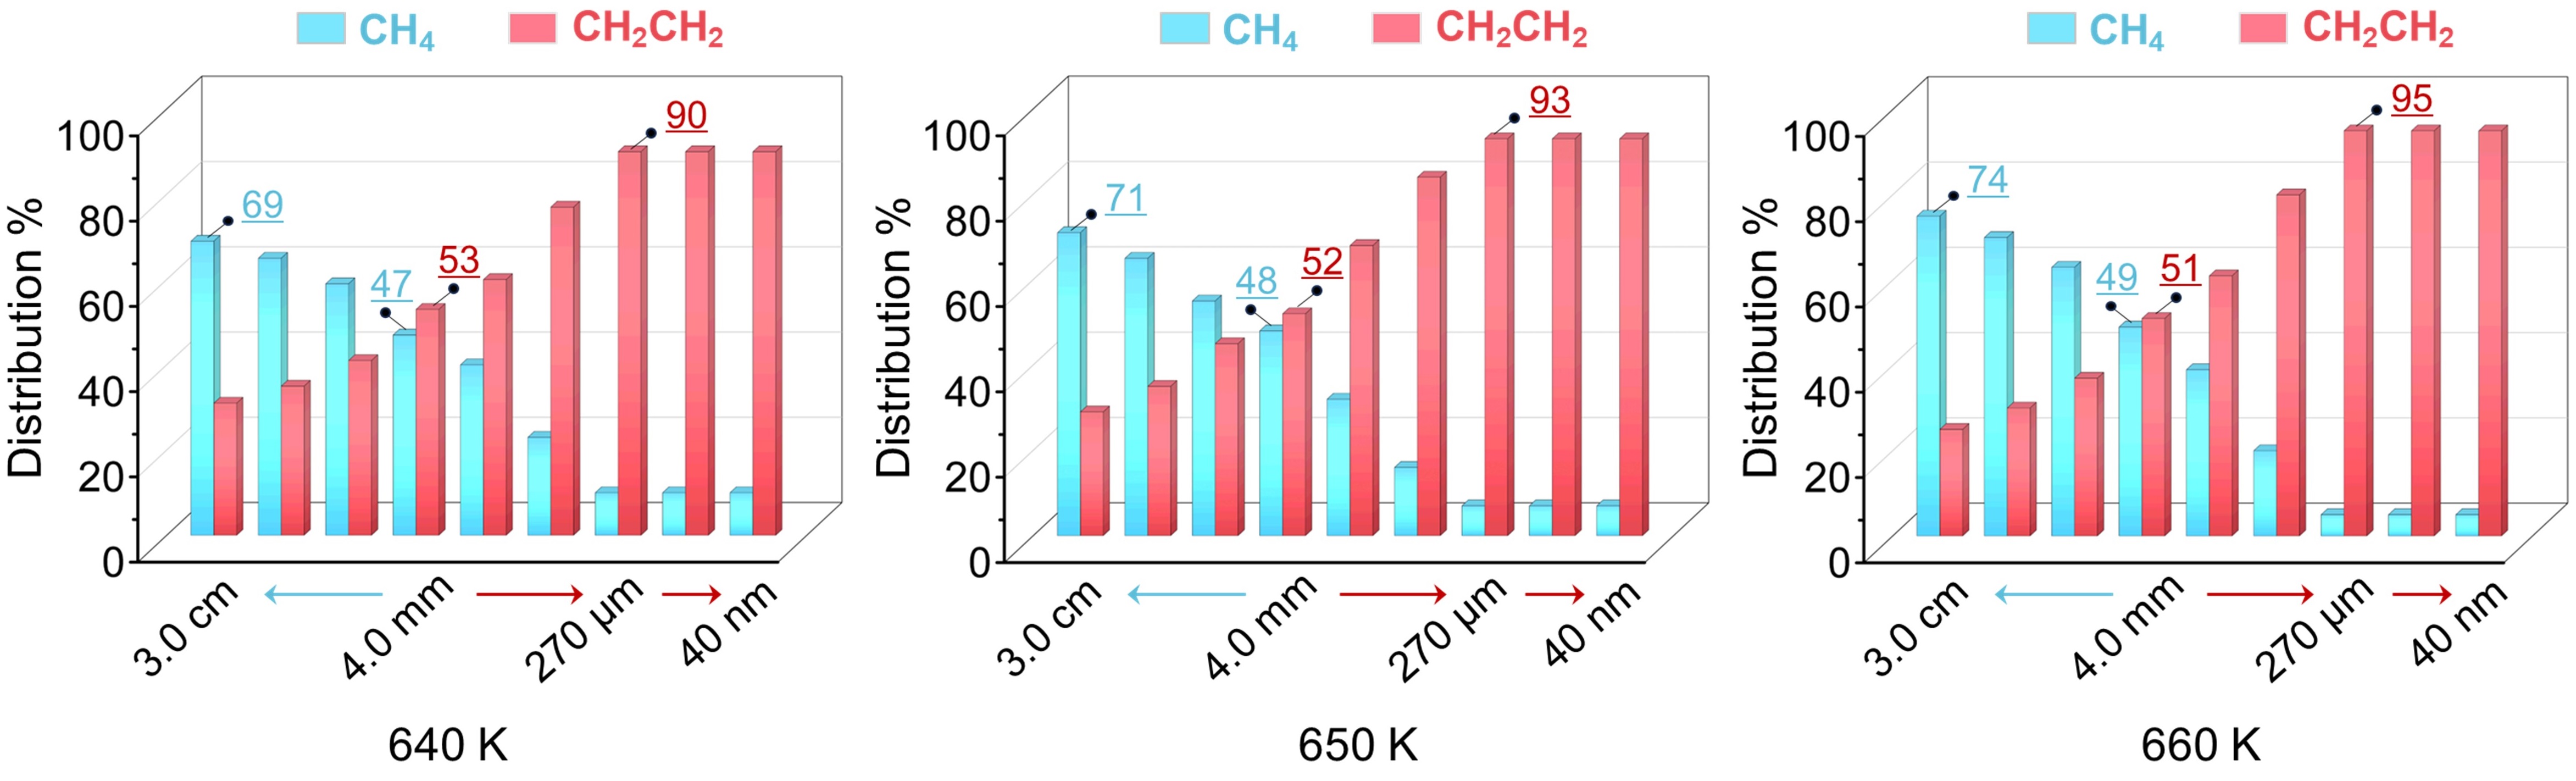


**Figure S7.** Distributions of the products (C2H4 versus CH4) as a function of *l* of ZnCrOx and MOR at different temperatures.

**Supplementary Information S5. Evaluation of the** **diffusivities,** **derivation of the diffusion barrier for diffusion process of gas species at proximity of oxide and zeolite, and the reaction phase diagram calculations of different Zn species migrations**

**1. Diffusivities of gas phase species**

Experimental and theoretical researchers have evaluated the diffusivities of many gas species on the zeolite, such as CH4, C2H4, C3H6 and C3H8.8-13 Moreover, they found that the diffusivities (*D*) is closely related with the number of carbon, indicating that the gas molecules with the same carbon atoms behave the similar diffusivities.10, 13 Thus, based on the reported data in the literature,8, 13 we obtain the diffusivities of CH4 (1.77×10-11), which can be corrected to the experimental conditions of *T* = 650 K by following the equation (S14) (i.e., 8.42×10-11), while the diffusivities of CH3OH and CH2CO at 650 K can be approximately replaced with that of ethylene (3.52×10-10).

(S14)

**2. Derivation of the diffusion barrier for diffusion process of gas species at proximity of oxide and zeolite**

In this work, the widely used Fick’s law is applied to describe the realistic diffusion process of intermediate species at the proximity of ZnCrOx/MOR bifunctional catalyst, which is a macroscopic law describing the phenomenon of gas diffusion and can be expressed as:

(S15)

where *J*, *n*, *D*, *A*, *C* and *l* are the diffusion flux, the number of the moles of gas, the diffusion coefficient, the cross-section area, the volume concentration, and the diffusion distance, respectively. Furthermore, we can derive the diffusion flux of each molecule according to equation (S15).

(S16)

where *N* and *NA* represent the number of molecules and the Avogadro constant. Together with the “Ideal Gas Law” *pV* = *nRT*, equation (S16) can be written as:

(S17)

where *p*1 and *p*2 stand for the pressure of initial and final states. As equation (S17) shows, it can be physically understood by a gas-phase reaction step with different pressures at both ends and its free energy change is zero. Accordingly, is the reaction rate constant of this reaction step. Thus, based on the form of the transition state theory, we can obtain the relations between the *l* and the energy barrier of the gas-reaction step as follows.

(S18)

Experimental researchers have demonstrated that the ketene generated from oxides preferentially diffuses into the 12-membered ring of MOR and then enters the 8-membered ring side pocket of MOR to trigger the formation of light olefins.7 Thus, the cross-section area *A* is approximately evaluated with the area of the 12-membered ring aperture (66.9 Å2).

We have also compared the predictions of molecular volume (*V*) between van der Waals equation of state and ideal gas law under reaction conditions (*p* = 2.5 MPa, *T* = 650 K). As shown in the table below, these differences are almost negligible, indicating the applicability of idea gas law.

|  | van der Waals equation | ideal gas law |
| --- | --- | --- |
| CH4 | 2.163*10-3 | 2.162*10-3 |
| CH3OH | 2.049*10-3 | 2.162*10-3 |
| CH2CH2 | 2.144*10-3 | 2.162*10-3 |
| CH3CHCH2 | 2.089*10-3 | 2.162*10-3 |

**3. Reaction phase diagram calculations of different Zn species migrations**

To evaluate the possibility of Zn species migration, the reaction phase diagram of different Zn species migration from ZnCrOx to MOR was calculated by following the equations (S19)-(S22):

Zn2+: Zn16Cr32O60 + H2Al2/MOR → H2Zn15Cr32O60 + Zn-Al2/MOR ∆*G* = 2.33 eV (S19)

ZnO: Zn16Cr32O60 + H2Al2/MOR + H2O → H2Zn15Cr32O60 + ZnO-H2Al2/MOR ∆*G* = 3.31 − ∆*μ*(H2O) (S20)

Zn[OH]+: Zn16Cr32O60 + H2Al2/MOR + H2O → H2Zn15Cr32O60 + ZnOH-HAl2/MOR ∆*G* = −0.76 − ∆*μ*(H2O) (S21)

Zn(OH)2: Zn16Cr32O60 + H2Al2/MOR + 2H2O → H2Zn15Cr32O60 + Zn(OH)2H2Al2/MOR ∆*G* = 0.55 − 2∆*μ*(H2O) (S22)

where Zn16Cr32O60 and H2Al2/MOR represent the calculation models of ZnCrOx(110) and MOR (H2Al2Si46O96), respectively. Notably, H2Zn15Cr32O60 is the model with the addition of H to balance the charge of the system after Zn species migration. As can be seen from equations (S19)-(S22), the Gibbs free energy of the reaction phase by Zn2+ species migration remains unchanged, while those of the other three species migrations are determined by the potential of H2O. Thus, by varying the partial pressure of H2O (10−7 to 1 atm), we can obtain their reaction phase diagram at the experimental conditions of 650 K, shown in Figure 3e in the main text.


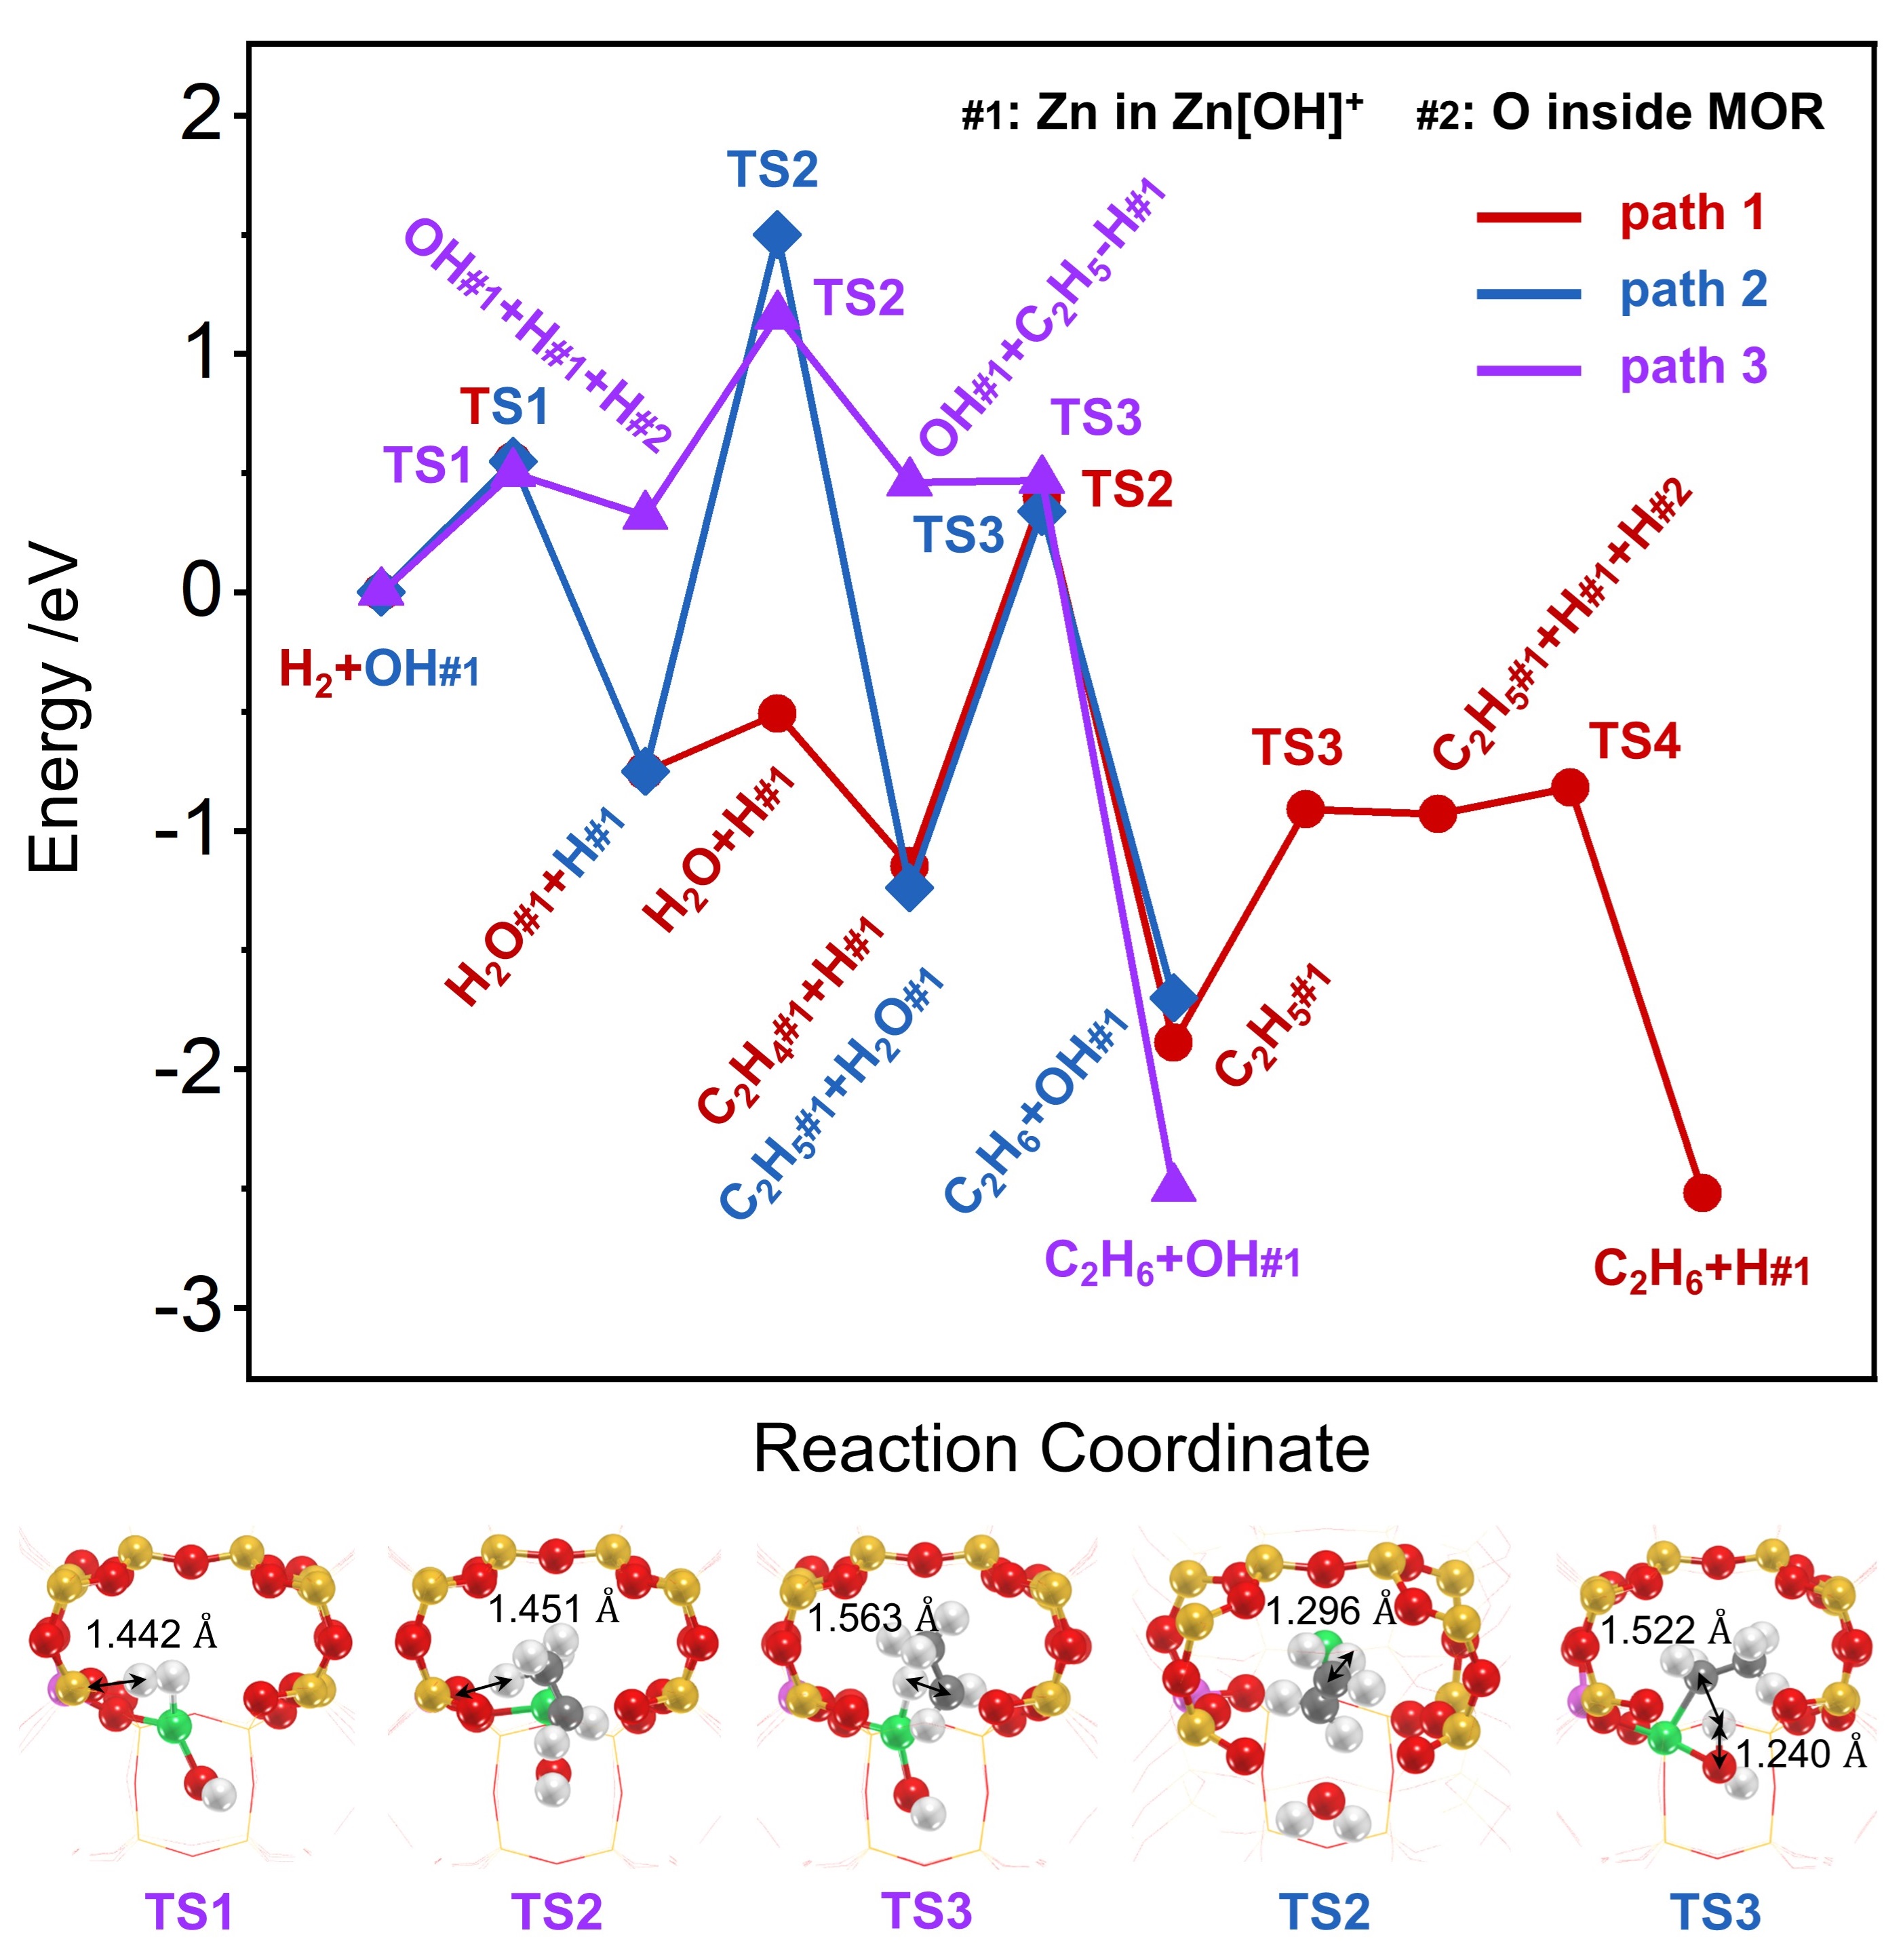


**Figure S8**. The energy profiles of the C2H4 hydrogenation on the [ZnOH]+ site over MOR.

**Supplementary Information S6. Derivation of the overall reaction rate and the optimal space velocity on the generalized reaction-diffusion coupling kinetic model**

To shed light on the principles for determining the optimal combination between oxide and zeolite components, we abstracted a generalized reaction-diffusion coupling kinetic model under the condition of the optimal proximity, which can be described by CH2CO-mediated syngas conversion to light olefins on OX-ZEO (R → I → P) as follows.

Oxide: CO + H2 (R) → CH2CO (I) (R1)

OX-ZEO: CO + H2 (R) → CH2CO (I) → C2H4 (P) (R2)

With the framework of law of mass action, we first obtained the reaction rate of each elementary step.

Oxide: (S23)

OX-ZEO: (S24)

OX-ZEO: (S25)

where *k*1*f* (*k*1*r*) and *k*2*f* (*k*2*r*) represent the forward (reverse) rate constants on oxide and zeolite, respectively. *pi* (*i* = R, I, P) is the pressure of gas species *i*. Based on the steady state approximation at the condition of space velocity (*F*):

Oxide: (S26)

OX-ZEO: (S27)

OX-ZEO: (S28)

*F'* represents the *F* in the unit of s-1. We can obtain:

Oxide: (S29)

OX-ZEO: (S30)

OX-ZEO: (S31)

Subsituting equation (S29) and equations (S30)-(S31) to equation (S26) and equations (S27)-(S29), respectively, the formation rate of I on oxide and I and P on OX-ZEO can be derived:

Oxide: (S32)

OX-ZEO: (S33)

OX-ZEO:  (S34)

where *roxide-(I)* and *rOX-ZEO-(P)* are simply denoted as *rI* and *rP*, respectively. To reveal the optimal velocity *F'*, the partial differential of the formation rate of I on oxide and P on OX-ZEO against *F'* is first taken:

Oxide: (S35)

OX-ZEO: (S36)

The above results clearly indicate that *rI* increases with the increase of *F'* because their partial differentials exceed 0, while *rP* first increases and then decreases with the increase of *F'*, leading to the maximum at *F'*=(*k1r***k2r*)1/2, i.e., the optimal *F'* for the formation of P on OX-ZEO should satisfy the condition of (*k1r***k2r*)1/2.

To quantitatively evaluate the quality of the combination of oxide and zeolite, we provide the enhancement factors *λ*, presenting the enhancement effect of zeolite on the selectivity of light olefines (P), which can be expressed as:

(S37)

It is clear from equation (S37) that *λ* is closely related to *F'* in addition to the intrinsic catalytic ability (*k*) of oxide and zeolite. Thus, the influence of *F'* and *k* on *λ* is first analyzed. Experiments have shown that the formation of CH2CO on oxide is an endothermic process while its conversion on zeolite is the exothermic under typical conditions of H2/CO = 1.5, *p* = 2.5 MPa, *T* = 650 K, which implies*k*1*f* < *k*1*r* and *k*2*f* > *k*2*r* kinetically. Based on this, all possibilities are discussed among *F'* and *k* of oxide and zeolite as follows.

1. When *F'* > *k*1*r* and *F'* >(or <) *k*2*f*, *λ* ≈ *k*2*f* /( *F'* + *k*2*f*) < 1 by combining equation (S37), suggesting that the introduction of zeolite can not improve the selectivity of light olefins.
2. When *F'* < *k*1*r* and *F'* > *k*2*f*, *λ* ≈ *k*2*f* / *F'* < 1 by substituting it into equation (S37). This also indicates that the introduction of zeolite can not enhance the selectivity of light olefins.
3. When *F'* < *k*1*r* and *F'* < *k*2*f*, *λ* ≈ *k2f * k1r /(( k2f + k1r) * F' + k1r * k2r)* > 1 by substituting it into equation (S37), implying that the selectivity of light olefins can be greatly promoted by coupling zeolite.

To facilitate the comparison with the energy barrier of the elementary reactions, *F'* can be quantified in the form of energy (*E*a) as follows:

(S38)

Expanding equation (S38) and collecting terms, we get:

(S39)

where *R*, *T*, *k*B, *h*, *NA* and *p*。 represent the gas constant, the reaction temperature, the Boltzmann constant, the Planck constant, the Avogadro constant and the standard atmospheric pressure, respectively. Notably, the unit of the *F* is m3/(mol*s).

**Table S2.** Degree of kinetic rate control (*X*RC,*i*) of some important elementary reaction steps for CH2CO formation on ZnCrOx in the syngas conversion and C2H4 formation on MOR in the CH2CO conversion.

| ZnCrOx | | MOR | |
| --- | --- | --- | --- |
| Step *i* | CH2CO | Step *i* | C2H4 |
| *X*RC*,i* | *X*RC*,i* |
| CHO#1 + #1 ⇆ CH#1 + O#1 | 0.32 | CH3CO+#3 ⇆ CH3#3 + CO_in | 0.62 |
| CH#1 + H#1 ⇆ CH2#1 + #1 | −0.25 |  |  |
| CH3#1 + OH#1 ⇆ CH4 + #1 + O#1 | −0.32 |  |  |
| CH3O#1 + #2 ⇆ CH3#2 + O#1 | ‒0.03 |  |  |

**Supplementary Information S7. Analysis of the optimal *l***

The optimal *l* was analyzed by separating the diffusion process from our reaction-diffusion kinetic model (i.e., the kinetic model changes from two to three steps), with the corresponding Gibbs free energy profile depicted in Figure S9. For clarity and ease of comprehension, we first used the ZnCrOx-coupled zeolite as an illustrative example. The corresponding diffusion-bridged coupling kinetic model is illustrated in Figure S9a. For the case of *k*1*r* < *F'*×*Keq*2 at the experimental *F'* for ZnCrOx (Figure S9a), we have revealed in the main text that *k*2*f*  > *k*1*r* is the optimal condition for zeolite design, where the catalytic ability of ZnCrOx becomes the limiting factors for the light olefin formation. Consequently, according to our previous theoretical work identifying the rate-limiting step of the overall reaction,14 we can determine that *kd* > *k*1*r* is the requirement for the diffusion process not to limit the light olefin selectivity.

Similarly, for the condition where *k*1*r* > *F'*×*Keq*2, the critical kinetic constraint for zeolite optimization is *k*2*f*  = *F'*×*Keq*2 (Figure S9b). Under this condition, the optimal combination of oxide and zeolite is independent of the diffusion process when the diffusion process satisfies the condition *kd*  > *F'*×*Keq*2.

Combining these two situations, we can determine the critical condition of the diffusion process, which requires *kd*  > *F'*×*Keq*2. Together with the optimal *F’* derived for OX-ZEO catalyst design in the main text (*F’* = (*k*1*rk*2*r*)1/2), we can obtain *kd* > (*k*1*r* /*k*2*r*)1/2×*k*2*f*, and thus the optimal *l* should satisfy based on equation (S18). This quantitative formula provides a framework for selecting the appropriate distance when designing OX-ZEO bifunctional catalysts.


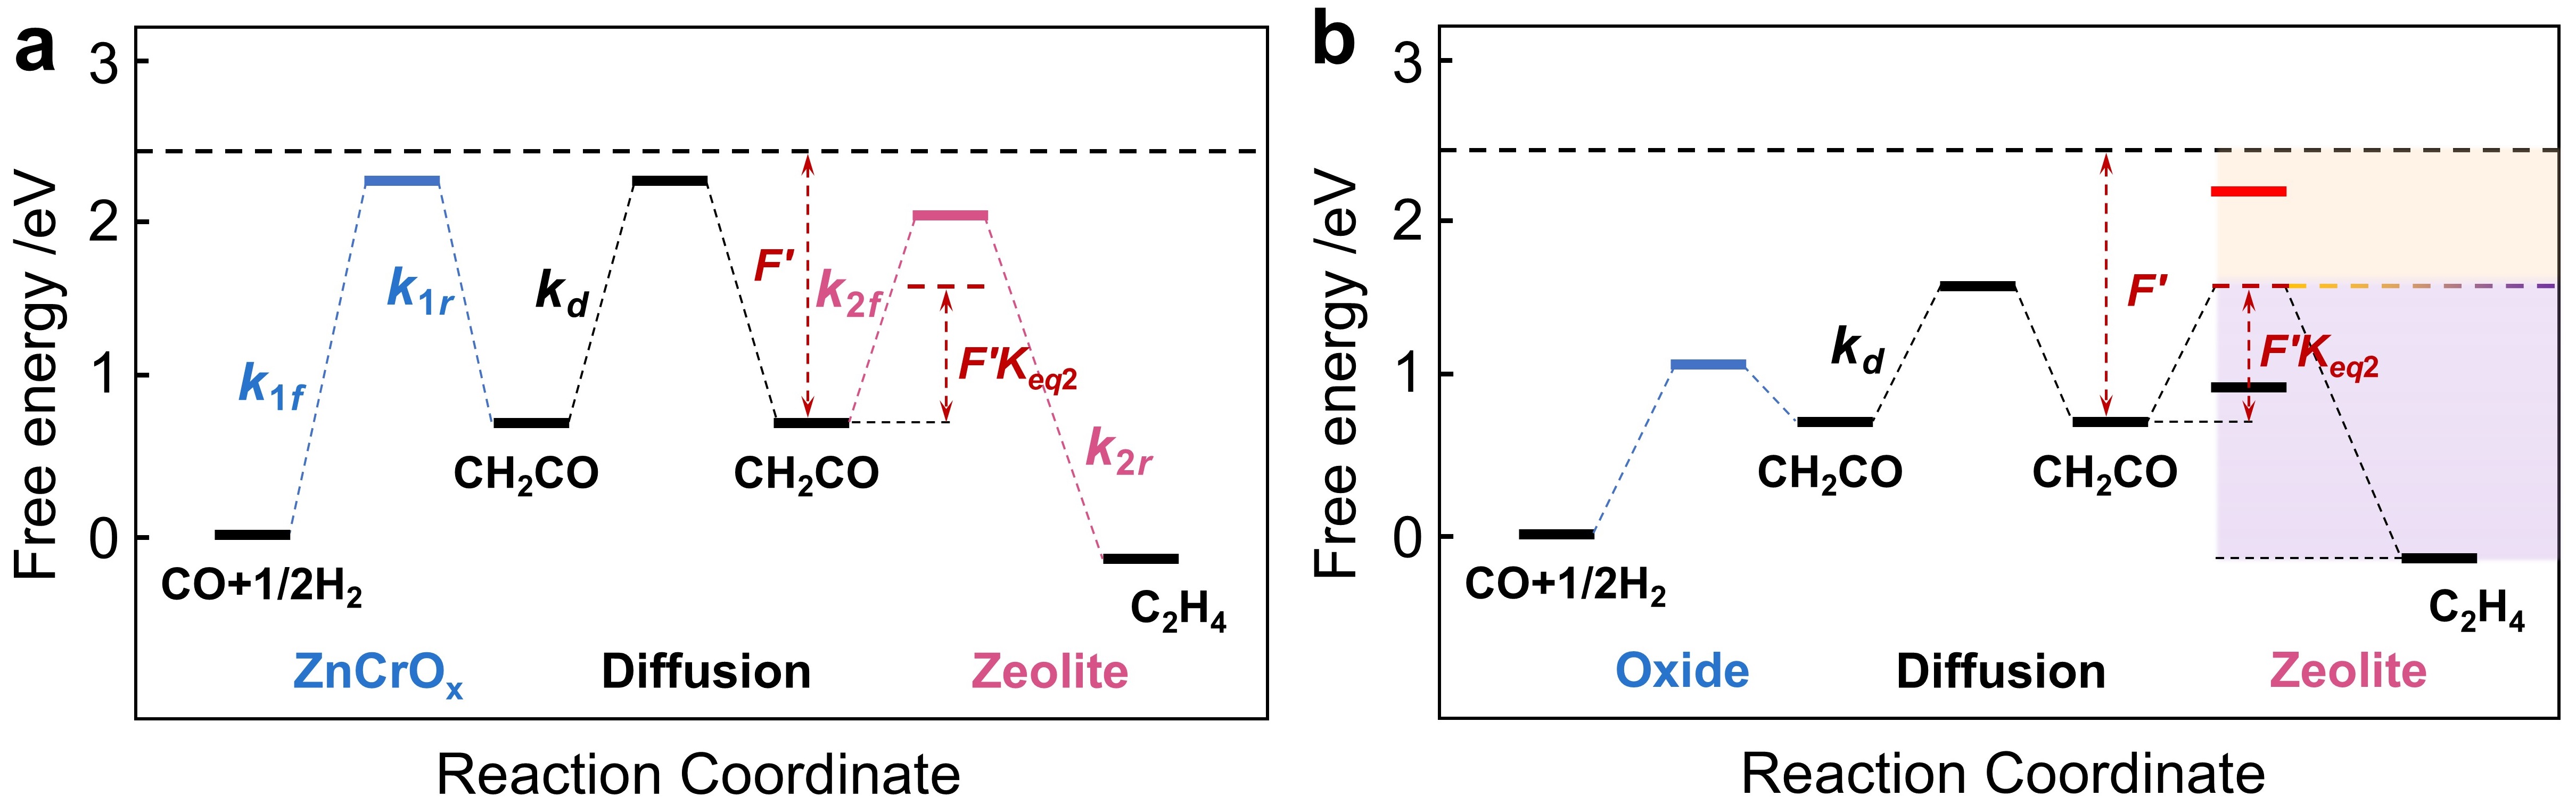


**Figure S9.** (a) Schematic of the relations among*F'*, *k*2*f*, *k*1*r*, *kd*, and *F'* × *Keq*2 on zeolite-ZnCrOx system. (b) The effective energy profile of syngas conversion to light olefins on the bifuctional catalysts of oxide combined zeolite, wherein the orange and purple labels correspond to the kineitic and thermodynamic control zones in Figure 5d of the main text, respectively.


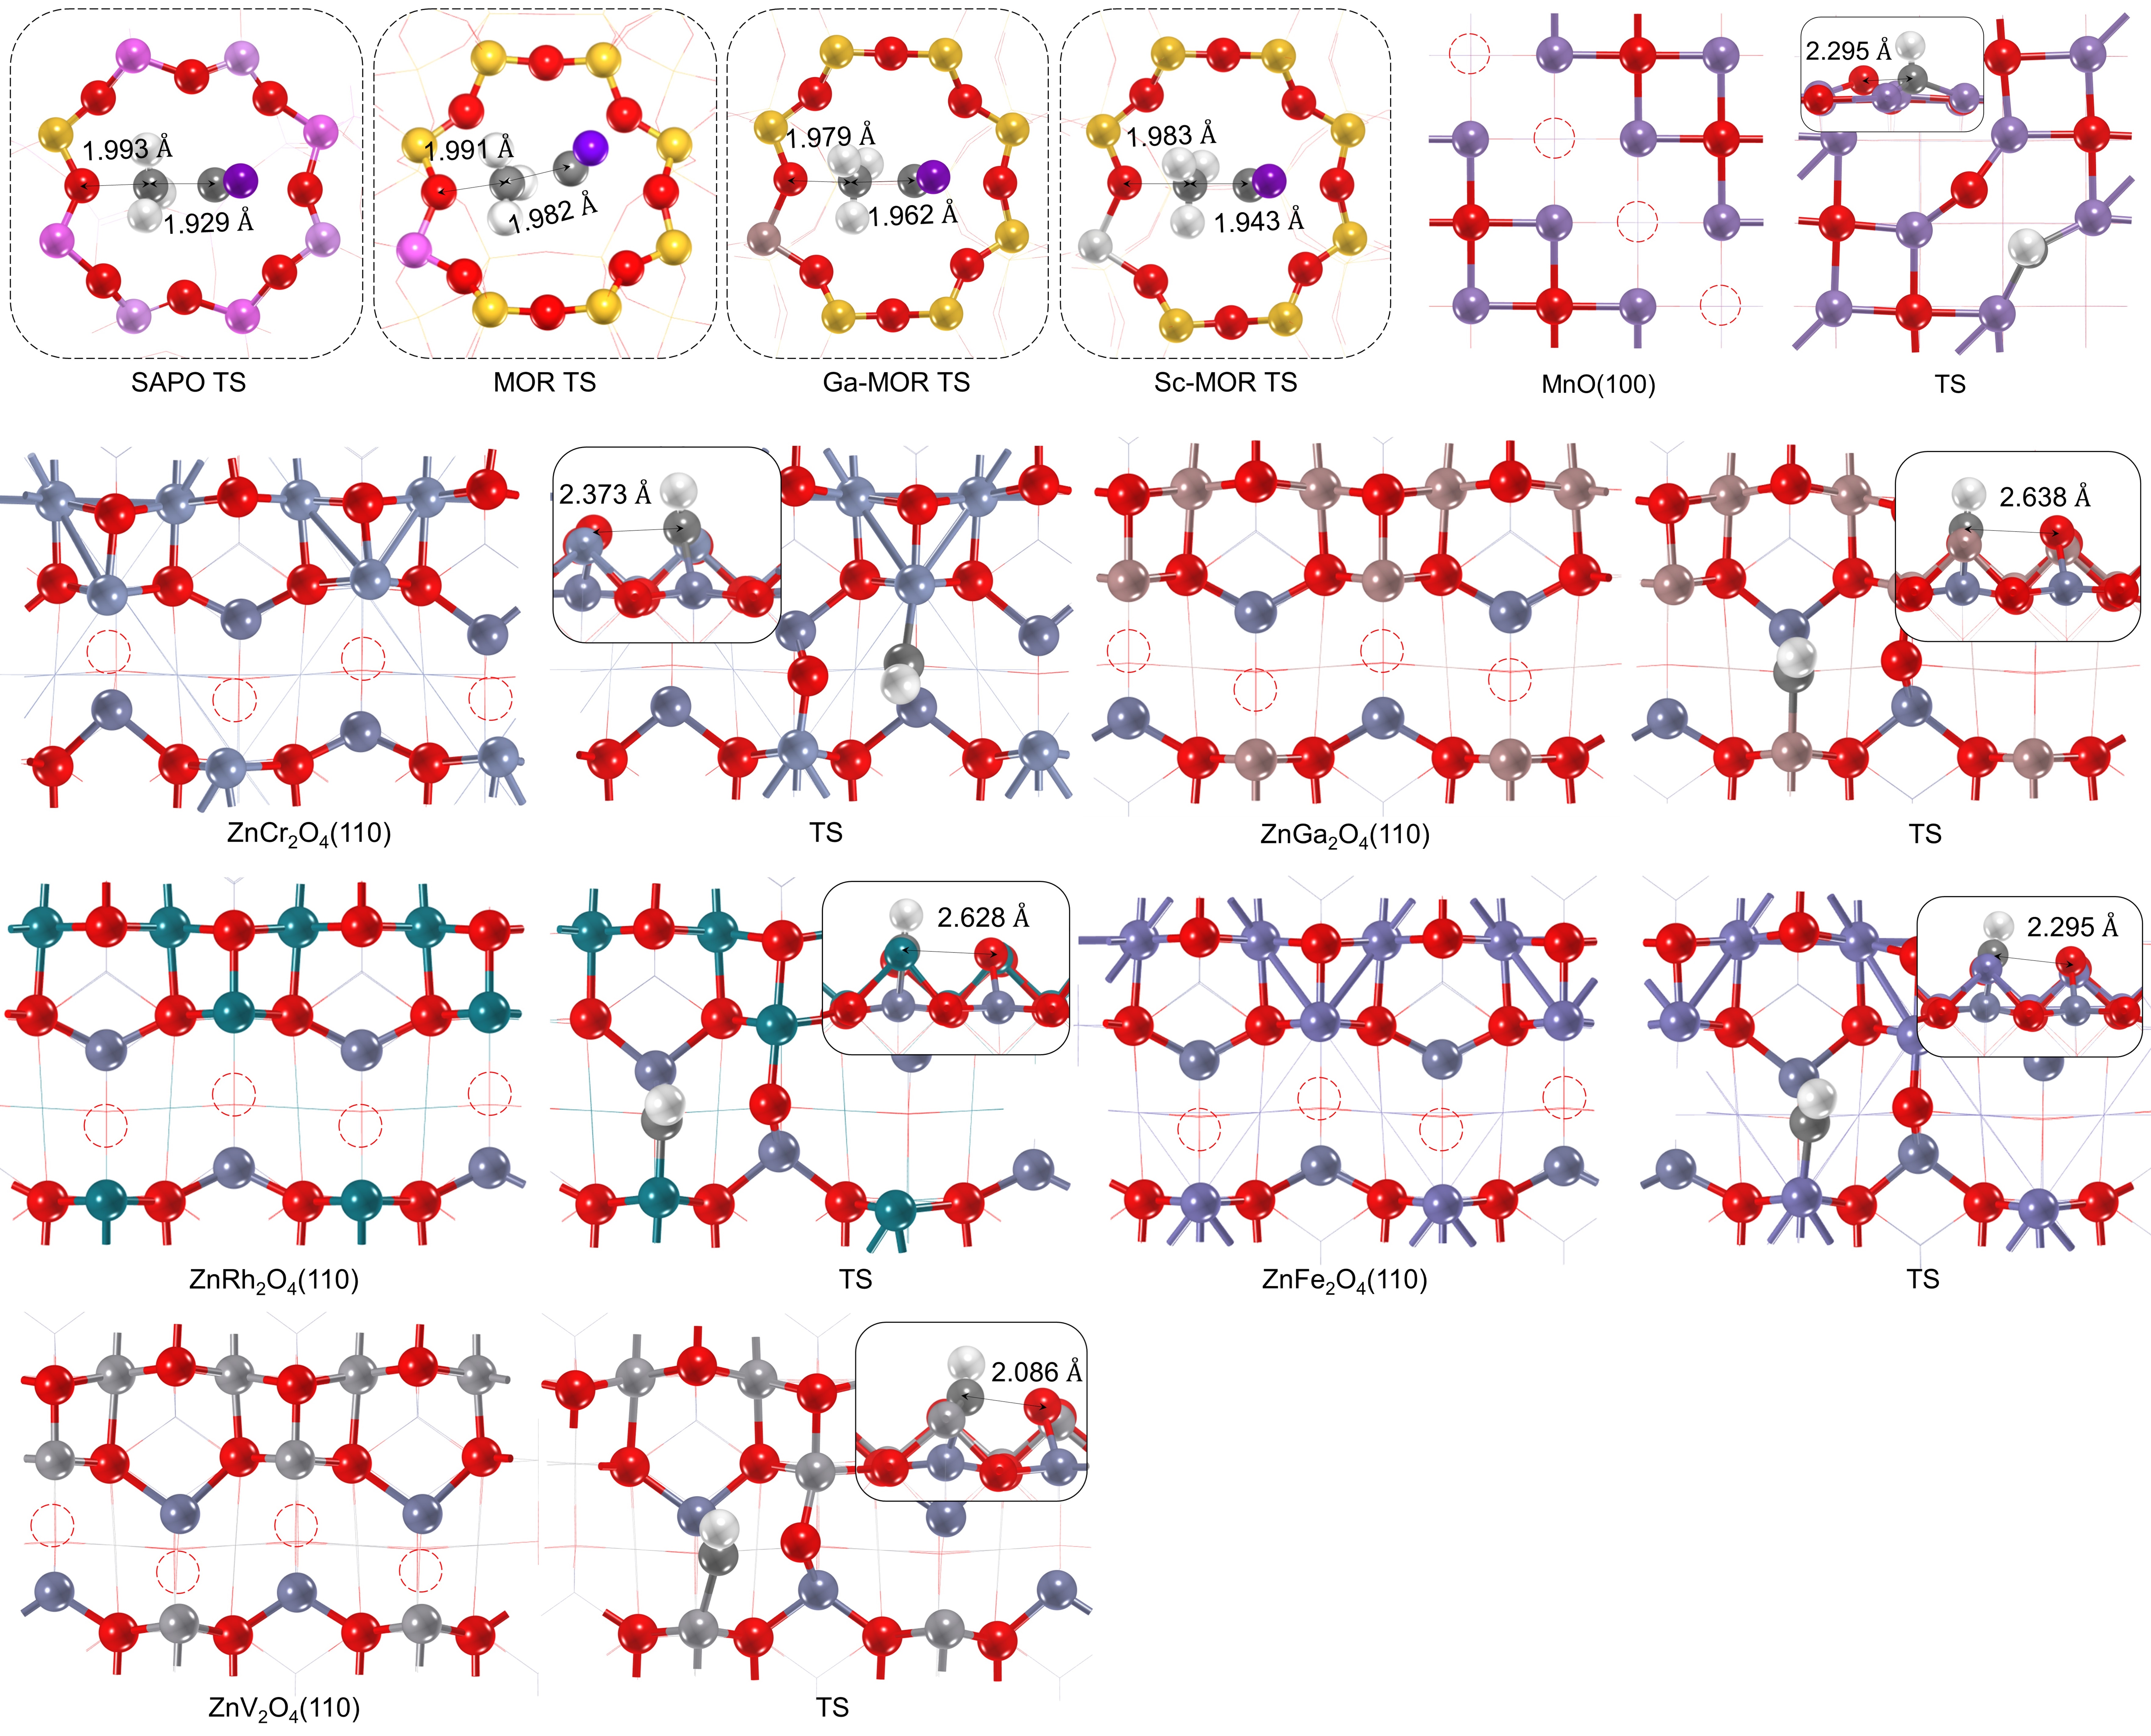


**Figure S10.** Optimal transition state structures for CH3CO+ decarbonylation within the HSAPO-34, MOR, Ga-doped MOR and Sc-doped MOR, as well as the CHO dissociation on highly reduced MnO (110), ZnCr2O4(100), ZnGa2O4(110), ZnRh2O4(110), ZnFe2O4(110), and ZnV2O4(110), respectively.

**References**

1. Bukowski, B. C.; Keil, F. J.; Ravikovitch, P. I.; Sastre, G.; Snurr, R. Q.; Coppens, M.-O. Connecting Theory and Simulation with Experiment for the Study of Diffusion in Nanoporous Solids. *Adsorption* **2021**, 27, 683-760.

2. Lai, Z. Z.; Sun, N. L.; Jin, J. M.; Chen, J. F.; Wang, H. F.; Hu, P. Resolving the Intricate Mechanism and Selectivity of Syngas Conversion on Reduced ZnCr2O*x*: A Quantitative Study from DFT and Microkinetic Simulations. *ACS Catal.*, **2021**, 11, 12977-12988.

3. Xiong, D. F.; Lai, Z. Z.; Yuan, H. Y.; Chen, J. F.; Wang, H. F. Ketene Conversion Chemistry within Mordenite Zeolite: Pore-Size Dependent Reaction Mechanism, Product Selectivity and Catalytic Activity. *JACS*, 2024, Resubmitted.

4. Ji, Y.; Gao, P.; Zhao, Z. C.; Xiao, D.; Han, Q.; Chen, H. Y.; Gong, K.; Chen, K. Z.; Han, X. W.; Bao, X. H.; Hou, G. J. Oxygenate-Based Routes Regulate Syngas Conversion over Oxide-Zeolite Bifunctional Catalysts. *Nat. Catal*. **2022**, 5, 594-604.

5. Wang, C. M.; Wang, Y. D.; Xie, Z. K. Methylation of Olefins with Ketene in Zeotypes and Its Implications for the Direct Conversion of Syngas to Light Olefins: A Periodic DFT Study. *Catal. Sci. Technol.* **2016**, 6, 6644-6649.

6. Yan, H.; Feng, X.; Liu, Y. B.; Yang, C. H.; Shan, H. H. Catalytic Cracking of Acetic Acid and its Ketene Intermediate over HZSM-5 Catalyst: A Density Functional Theory Study. *Mol. Catal.* **2017**, 437, 11-17.

7. Jiao, F.; Pan, X. L.; Gong, K.; Chen, Y. X.; Li, G.; Bao, X. H. Shape-Selective Zeolites Promote Ethylene Formation from Syngas via a Ketene Intermediate. *Angew. Chem., Int. Ed.* **2018**, *57*, 4692-4696.

8. Chen, L. H.; Deng, Y. W.; Han, W.; E., J. Q.; Wang, C. H.; Han, D. D.; Feng, C. L. Effects of Zeolite Molecular Sieve on the Hydrocarbon Adsorbent and Diffusion Performance of Gasoline Engine during Cold Start. *Fuel,* **2022**, 310, 122427.

9. Yang, G.; Wang, C. M.; Li, Y.; Du, Y. J.; Wang, Y. D.; Xie, Z. K. Simple Structure Descriptors Quantifying the Diffusion of Ethene in Small-Pore Zeolites: Insights from Molecular Dynamic Simulations. *Inorg. Chem. Front.*, **2022**, 9, 1590-1602.

10. Jobic, H. Diffusion of Linear and Branched Alkanes in ZSM-5. A Quasi-elastic Neutron Scattering Study. *J. Mol. Catal. A. Chem.*, **2000**, 158, 135-142.

11. Smit, B.; Maesen, T. L. M. Molecular Simulations of Zeolites: Adsorption, Diffusion, and Shape Selectivity. *Chem. Rev.,* **2008**, *108*, 4125-4184.

12. Yuan, J.; Liu, Z.; Wu, Y.; Han, J.; Tang, X.; Li, C.; Chen, W.; Yi, X.; Zhou, J.; Krishna, R.; Sastre, G.; Zheng, A. Thermal Resistance Effect on Anomalous Diffusion of Molecules under Confinement. *Proc. Natl. Acad. Sci. U.S.A*. **2021**, *118*, e2102097118.

13. Jiang, H. J.; Hou, Z. H.; Luo, Y. A Kinetic View on Proximity-dependent Selectivity of Carbon Dioxide Reduction on Bifunctional Catalysts. *ACS Catal.*, **2020**, 10, 13518-13523.

14. Lai, Z. Z.; Chen, J. F.; Jia, M. L.; Hu, P.; Wang, H. F. Universal Skeleton Feature of the Three-Dimensional Volcano Surface and the Thermodynamic Rule in Locating the Catalyst in Heterogeneous Catalysis. *ACS Catal.* **2022**, 12, 247-258.
